# Supplementary material for: Structure-based discovery of hydrocarbon-stapled paxillin peptides that block FAK scaffolding in cancer
Source: Springer Nature journal article supplement (doi:10.1038/s41467-025-57196-9), 2025-02-28
Supplement: MOESM1 [file 41467_2025_57196_MOESM1_ESM.pdf]

## **Supplementary Information -**

### **Reyes et al. Structure-based discovery of hydrocarbon-stapled paxillin peptides that block FAK scaffolding in cancer**

#### **Table of Contents:**

**Supplementary Fig. 1.** General synthetic scheme for stapled peptides.

**Supplementary Fig. 2.** Analytical LC-MS confirms identity of 1907 & 2012 and quantifies >98% analyte purity by 214nm area%.

**Supplementary Fig. 3.** Surface plasmon resonance (SPR) studies characterize synthetic peptide binding to FAK focal adhesion targeting (FAT) domain.

**Supplementary Fig. 4.** Fluorescence Polarization (FP) assay characterizes peptide effect on inhibition of the FAK-paxillin interaction.

**Supplementary Fig. 5.** Hydrocarbon stapling enhances  $\alpha$ -helicity of peptides.

**Supplementary Fig. 6.** HSQC-NMR peak integration studies identify the FAT helix 2-3 binding site as the higher affinity site for peptide 1907 compared to the helix 1-4 site.

**Supplementary Fig. 7.** Stapled peptide 1907 displays binding at both FAT helix 2-3 and helix 1-4 sites at high concentrations.

**Supplementary Fig. 8.** FAT-1907 X-ray co-crystallography experiments.

**Supplementary Fig. 9.** Conformational and interaction changes between native paxillin LD2 peptide and stapled peptide 1907 as observed in the X-ray co-crystal structure.

**Supplementary Fig. 10.** Electron density maps of FAT-1907 X-ray co-crystal structure.

**Supplementary Fig. 11.** Additional electron density maps of FAT-1907 X-ray co-crystal structure.

**Supplementary Fig. 12.** Immunofluorescence assay showing 2012 cell permeability and de-localization of FAK from focal adhesions.

**Supplementary Fig. 13.** Immunofluorescence dose response assay showing 2012 induced de-localization of FAK from focal adhesions in SK-MEL-147 cells.

**Supplementary Fig. 14.** Immunofluorescence assay showing 2012 induced de-localization of FAK from focal adhesions in WM88 melanoma cells.

**Supplementary Fig. 15.** Immunofluorescence dose response assay showing 2012 induced de-localization of FAK from focal adhesions in WM88 melanoma cells.

**Supplementary Fig. 16.** Interaction between FAK and paxillin proteins is disrupted by 2012 treatment.

**Supplementary Fig. 17.** LDH release assay shows even at high micromolar doses of peptide 2012 and 2020 do not result in damage to plasma membrane.

**Supplementary Fig. 18.** Peptide 2012 induces apoptosis in dose-dependent and time-dependent manner via Annexin V apoptosis time-course study.

**Supplementary Fig. 19.** Peptide 2012 causes dose-dependent reduction in cancer-cell invasion via transwell invasion assay.

**Supplementary Fig. 20.** Peptide 2012 shows promising plasma and metabolic stability and no signs of toxicity *in vivo*.

**Supplementary Fig. 21.** Summary Figure: discovery of hydrocarbon-stapled paxillin mimetics with improved anti-cancer efficacy and selectivity compared to first-generation kinase-domain inhibitors.

**Supplementary Table 1.** Mass spectral characterization data for stapled peptides.

**Supplementary Table 2.** Data collection and refinement statistics (molecular replacement) of FAT-1907 X-ray co-crystal structure (PDB 6PW8).

**Supplementary Table 3.** FAT-1907 (6PW8) interactions  $\leq 4$  Å at the protein-peptide interface.

**Supplementary Table 4.** FAT-LD2 (1OW8) interactions  $\leq 4$  Å at the protein-peptide interface.

**Supplementary Table 5.** Eurofins KINOMEscan Profiling.

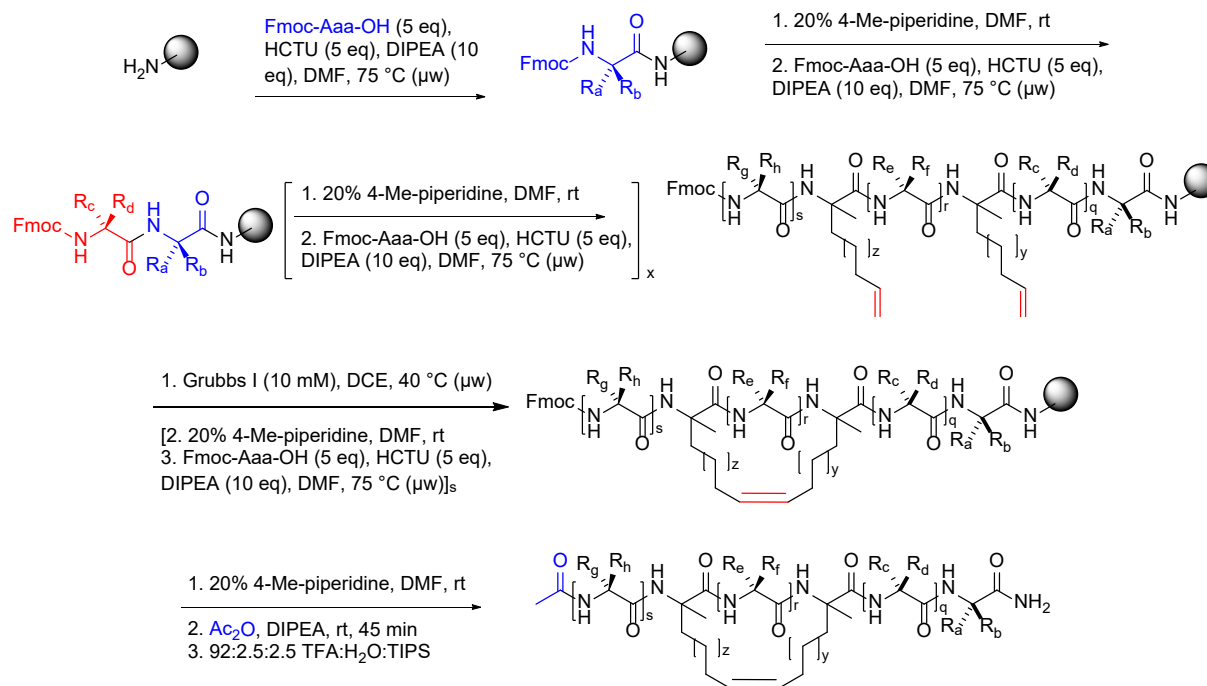

**Supplementary Fig. 1. General synthetic scheme for stapled peptides.** Alpha-helical stapled peptides are assembled C' to N' by serial elongation from a solid support by microwave-assisted solid-phase peptide synthesis. Unnatural olefin-containing amino acids are substituted at strategic positions to allow for favorable ring closing metathesis. Incubation with Grubbs' first-generation catalyst provides solid-supported stapled peptides in near quantitative yields, as a thermodynamic mixture of E and Z isomers (although only the Z isomer is pictured here). Peptides are optionally capped at the amine terminus by conjugation of acetate or myristate. Completed C' amidated peptides are liberated from the solid support by cleavage of the Rink Amide linker with high-TFA cocktail containing scavengers to assist in the concurrent removal of sidechain protecting groups.

**1907**

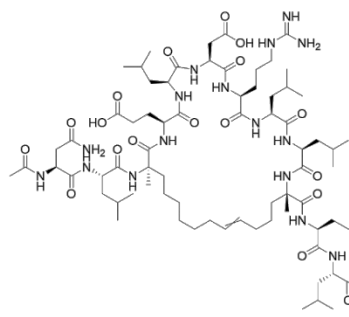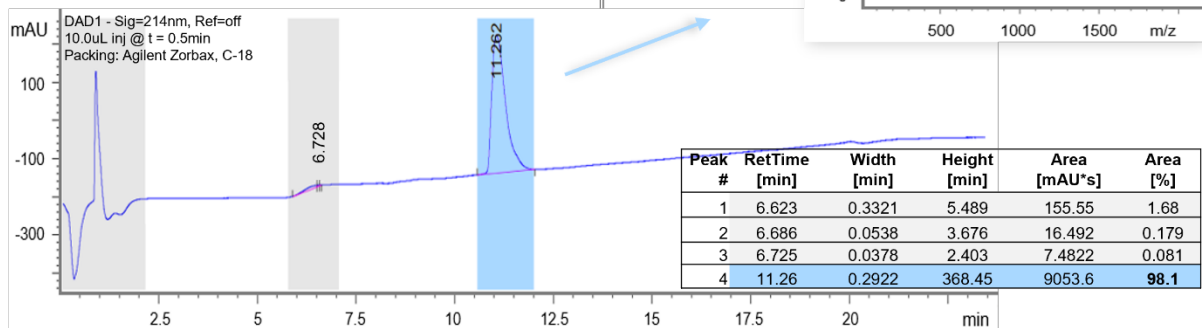

**2012**

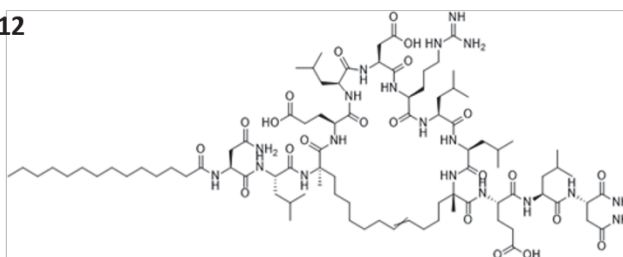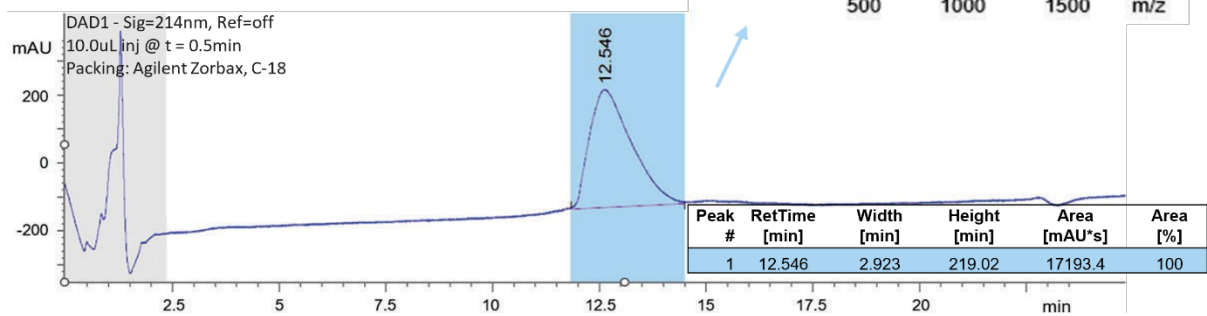

**HPLC program:** Agilent Zorbax C-18, 0.5mL/min, t=0.5min 10uL inject, t=3min gradient elution [10-100% (AcN+0.1%FA in ddH2O+0.1%FA)], t=20min isocratic hold to end of run.

**1907:**

**DAD UV-214nm:** peak identified RT=11.262min, automatic integration area% suggests >98% purity.

**ESI(positive):** scan t=[10.97-11.55], found 838.1, 1675.9, 849.1; C77H131N19O22 M=1673.97: ([M+2H]<sup>2+</sup>)/2 requires 837.99, [M+2H]<sup>2+</sup> requires 1675.97, ([M+Na+H]<sup>2+</sup>)/2 requires 848.48.

**2012:**

**DAD UV-214nm:** peak identified RT=12.546min, automatic integration area% suggests >98% purity.

**ESI(positive):** scan t=[11.57-14.49], found 922.2, 933.3; C89H155N19O22 M=1842.16: ([M+2H]<sup>2+</sup>)/2 requires 922.08, ([M+Na+H]<sup>2+</sup>)/2 requires 932.99.

**Supplementary Fig. 2. Analytical LC-MS confirms identity of 1907 and 2012 and quantifies >98% analyte purity by 214nm area%.** The peptide structure, chemical formula, molecular weight, and exact mass are listed above the UV-214nm chromatogram. An integration table is included in the bottom right-

hand corner of the chromatogram. The peak of interest is highlighted in blue, and gray highlighted areas represent solvent effects such as injection pressure differential and eluent additive absorption. The %TIC mass spectrum spanning the integrated time period is embedded above the peak of interest and confirms the identities of the analytes as 1907 and 2012 respectively.



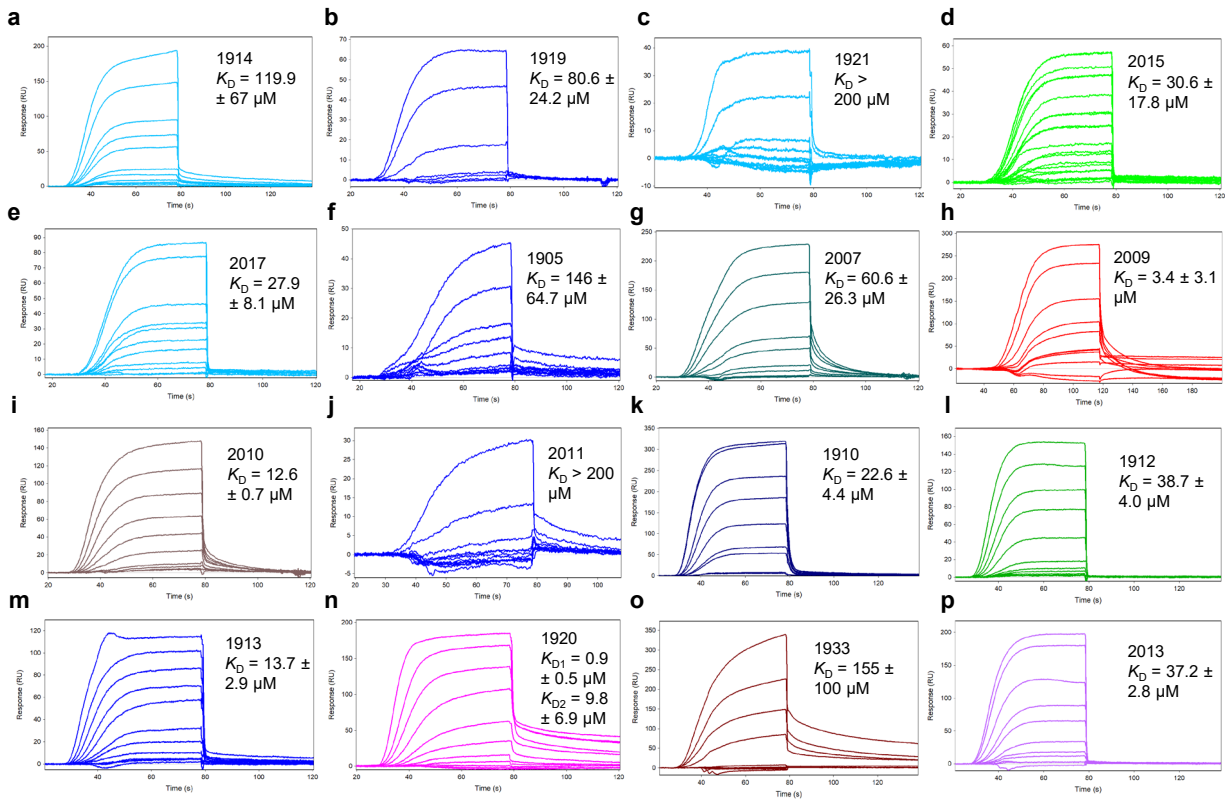

**Supplementary Fig. 3. Surface plasmon resonance (SPR) studies characterize synthetic peptide binding to FAK focal adhesion targeting (FAT) domain.** Representative SPR sensograms and average  $K_D \pm$  standard deviation for peptides (a) 1914 (n=4), (b) 1919 (n=4), (c) 1921 (n=3), (d) 2015 (n=4), (e) 2017 (n=4), (f) 1905 (n= 4), (g) 2007 (n=4), (h) 2009 (n= 3), (i) 2010 (n=2), (j) 2011 (n= 3), (k) 1910 (n= 4), (l) 1912 (n=4), (m) 1913 (n= 4), (n) 1920 (n= 3), (o) 1933 (n= 3), (p) 2013 (n=3). All values for ‘n’ represent independent biological replicates. Source data are provided as a Source Data file.

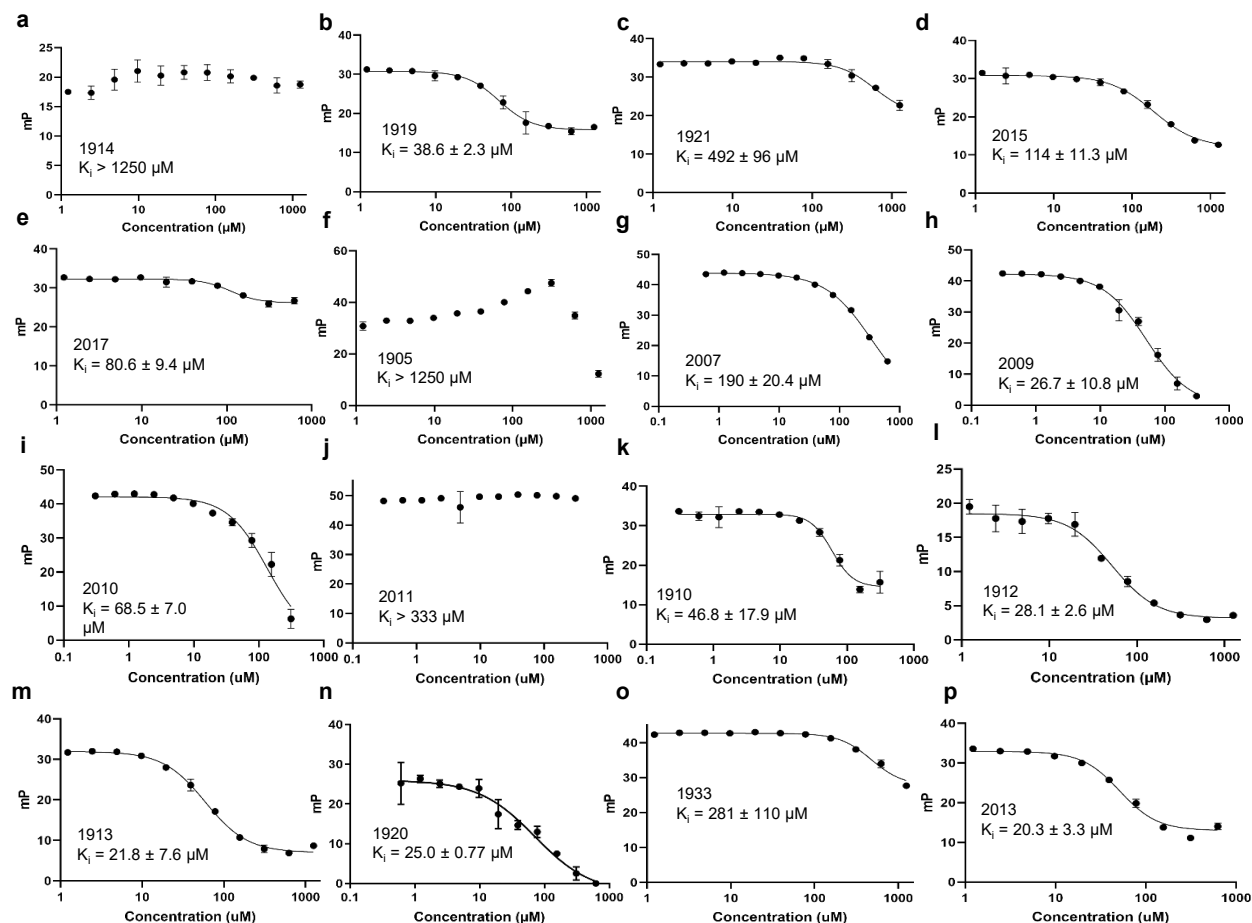

**Supplementary Fig. 4. Fluorescence Polarization (FP) assay characterizes peptide effect on inhibition of the FAK-paxillin interaction.** Representative FP competition curves and average  $K_i \pm$  standard deviation for peptides: (a) 1914, (b) 1919, (c) 1921, (d) 2015, (e) 2017, (f) 1905, (g) 2007, (h) 2009, (i) 2010, (j) 2011, (k) 1910, (l) 1912, (m) 1913, (n) 1920, (o) 1933, (p) 2013. All averages are reported from 3 replicates ( $n=3$ ). All values for 'n' represent independent biological replicates. Source data are provided as a Source Data file.

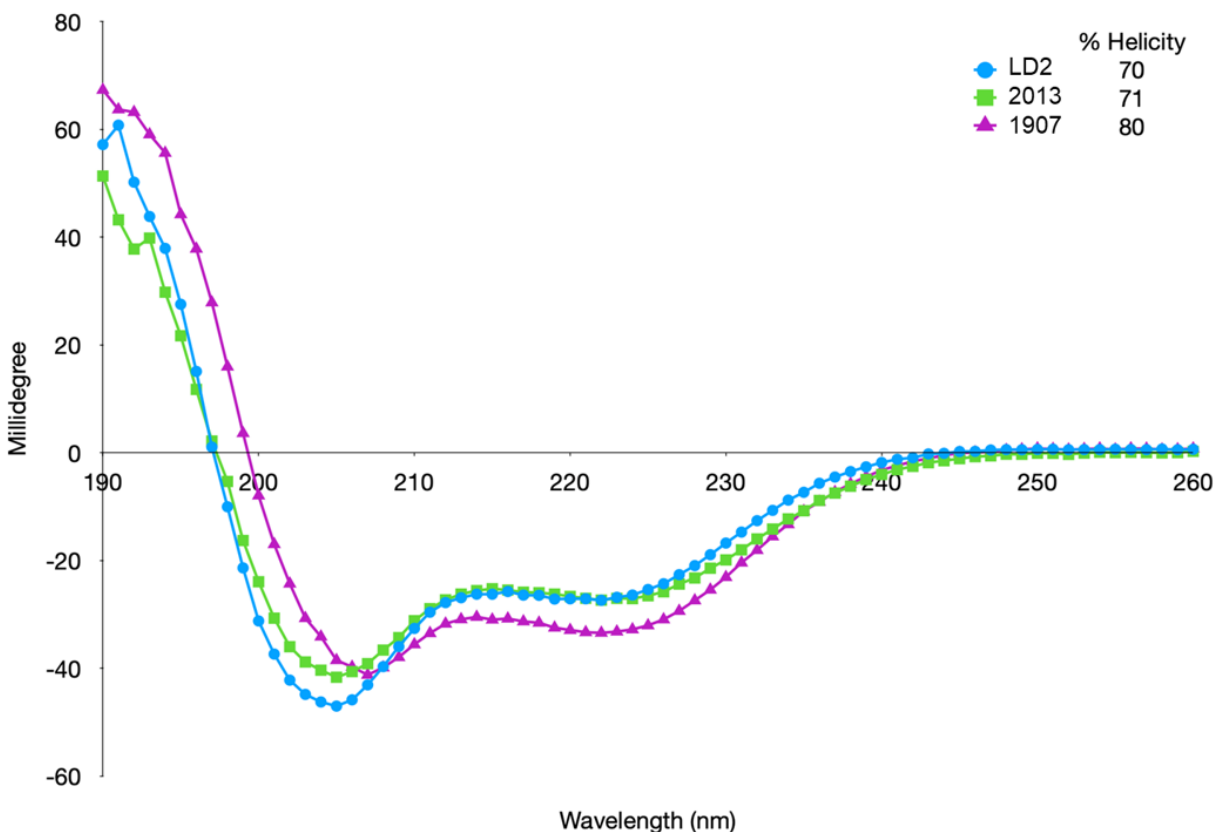

**Supplementary Fig. 5. Hydrocarbon stapling enhances  $\alpha$ -helicity of peptides.** Comparative circular dichroism analysis of native LD2, stapled peptide 1907, and unstapled peptide 1907 (2013) demonstrate that hydrocarbon stapling can increase  $\alpha$ -helical content by 10 % in aqueous sodium phosphate solution (pH 7.0). One biological replicate (n=1) was performed. Source data provided as a Source Data file.

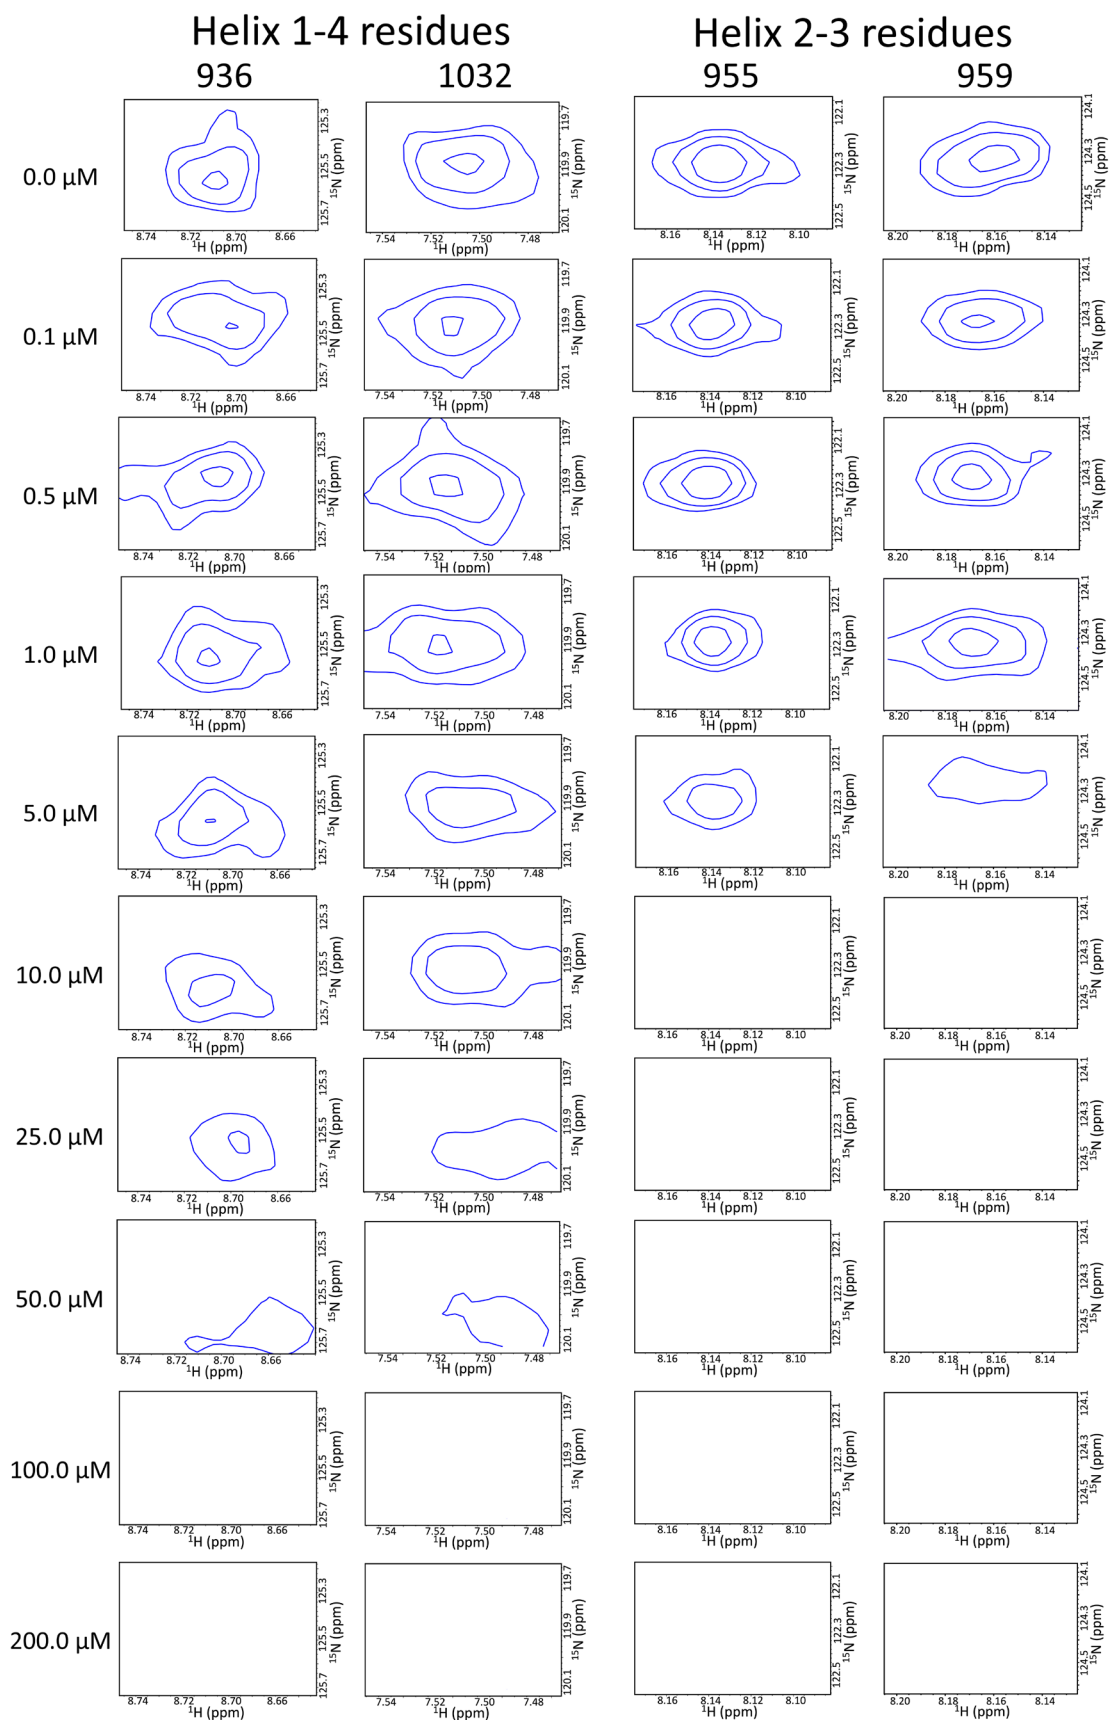

**Supplementary Fig. 6. HSQC-NMR peak integration studies identify the FAT helix 2-3 binding site as the higher affinity site for peptide 1907 compared to the helix 1-4 site.** HSQC contour plots of two residues in the 1-4 domain (936 and 1032) and two residues in the 2-3 domain (955 and 959) at various concentrations of 1907 (200, 100, 50, 25, 10, 5, 1, 0.5, 0.1, and 0.0  $\mu\text{M}$ ) and 100  $\mu\text{M}$  FAT demonstrate that saturation (loss of peak integration) is achieved in the 2-3 domain at lower concentrations than at the 1-4 binding site. Integration analysis of these peaks yield the binding curves shown in Figure 3.

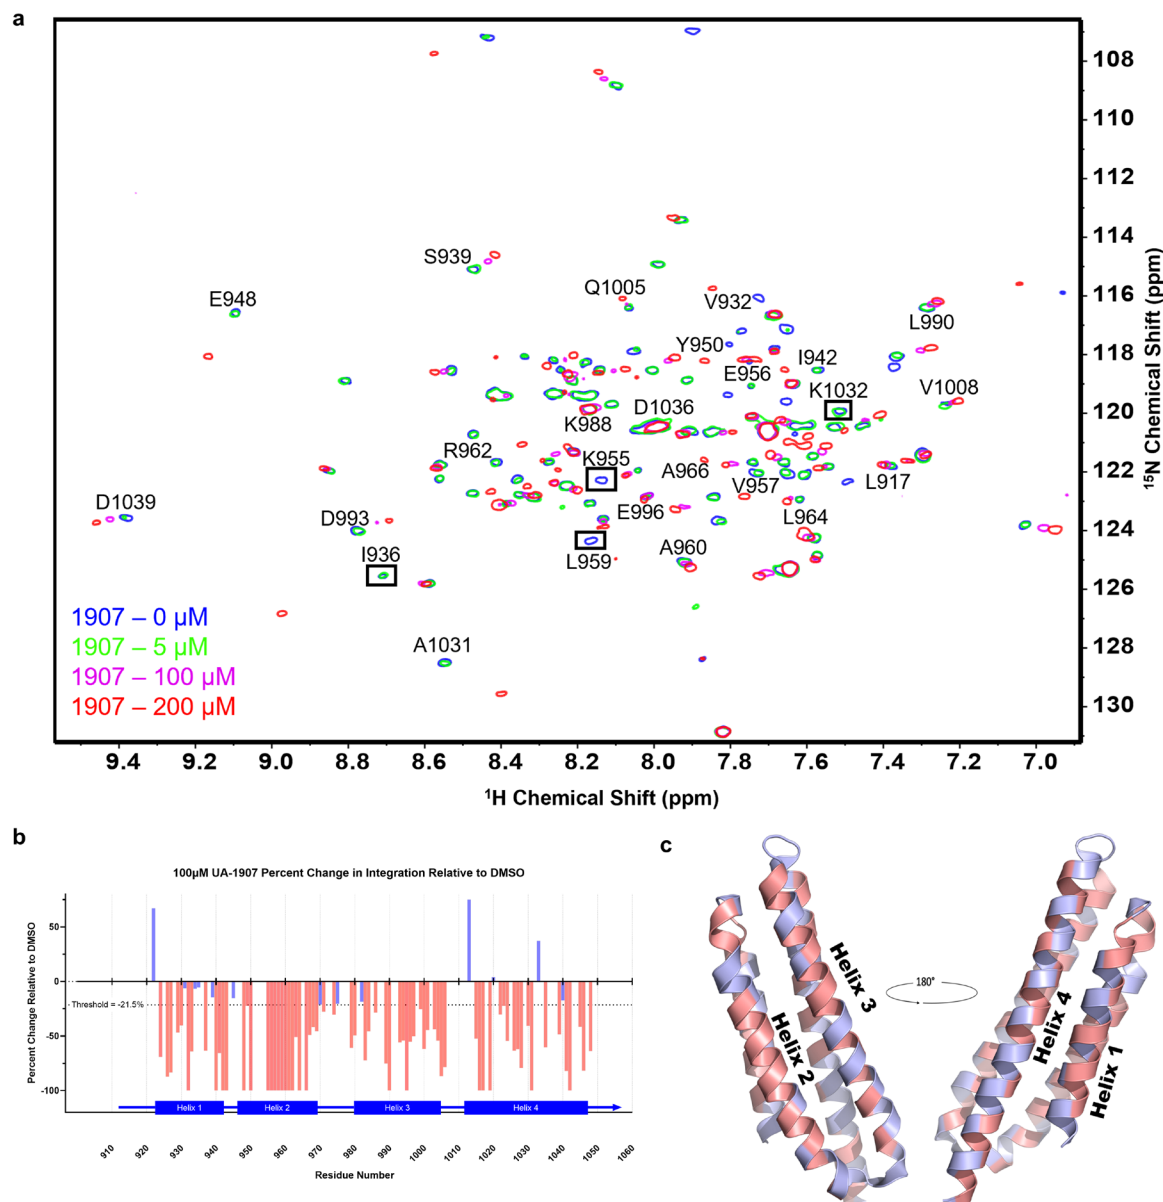

**Supplementary Fig. 7. Stapled peptide 1907 displays binding at both FAT helix 2-3 and helix 1-4 sites at high concentrations.** (a) Overlay of 2D HSQC spectra acquired with varying concentrations of 1907 and 100  $\mu$ M FAT. Two-dimensional signals represented in red, magenta, green, and blue were acquired in the presence of 200  $\mu$ M, 100  $\mu$ M, 5  $\mu$ M, and 0  $\mu$ M of 1907 respectively. Residues that were previously shown to have notable chemical shift perturbations in the presence of LD2 and have notable differences in integration between high and low concentrations of 1907, are marked. (b) Histogram of the residue-wise HSQC peak volume change, shown as percent relative to DMSO upon incubation of FAT with

100  $\mu$ M 1907. Highlighted residues match those in panel (c) Molecular model (PDB ID: 1OW8<sup>24</sup>) [<https://doi.org/10.2210/pdb1OW8/pdb>] of the 1907 binding surfaces on FAT. Residues with a <sup>1</sup>H-<sup>15</sup>N HSQC peak volume decrease of more than 21% (as derived from 1 standard deviation in Figure 3) are highlighted in the color salmon. Source data for (b) are provided as a Source Data file.

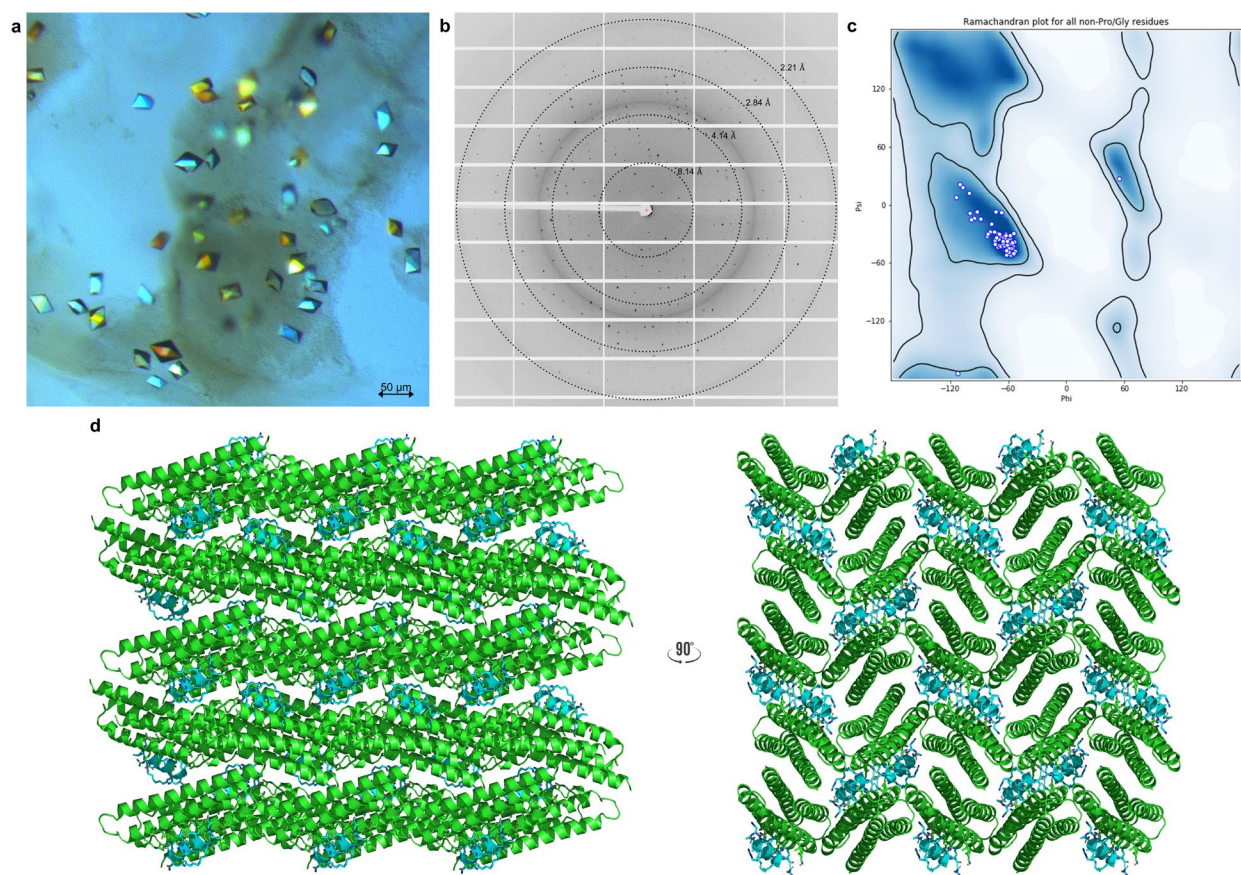

**Supplementary Fig. 8. FAT-1907 X-ray co-crystallography experiments.** (a) Co-crystallized FAT-1907 crystals used in X-ray data collection. (b) 2D X-ray diffraction pattern eliciting well-ordered protein crystal lattice. (c) Ramachandran plot after refinement indicating no structural outliers in the final model. (d) Crystal lattice of the solved structure belonging to space group  $P 2_1 2_1 2_1$ .



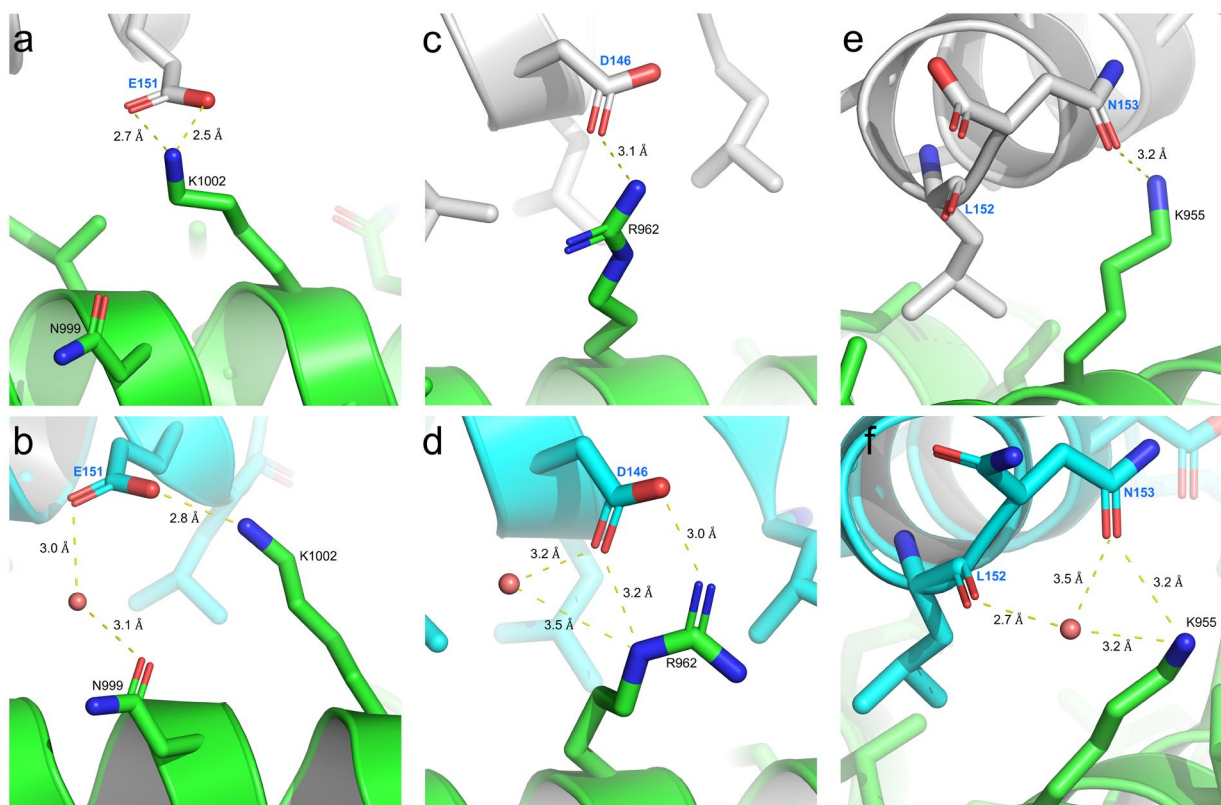

**Supplementary Fig. 9. Conformational and interaction changes between native paxillin LD2 peptide and stapled peptide 1907 as observed in the X-ray co-crystal structure.** Shifts in side chain orientation are seen in FAT (green) residues (a, b) K1002 and (c, d) R962 when bound by (a, c) LD2 (grey) compared to (b, d) 1907 (cyan) mediated by coordinated solvent molecules (salmon spheres). FAT residue (e, f) K955 show minimal perturbations in the (e) LD2 model compared to (f) 1907, with the addition of a coordinated solvent molecule forming a new interaction with 1907 residue L152 (LD2 PDB ID 1OW8 [<https://doi.org/10.2210/pdb1OW8/pdb>]; 1907 PDB ID 6PW8 [<https://doi.org/10.2210/pdb6PW8/pdb>]).

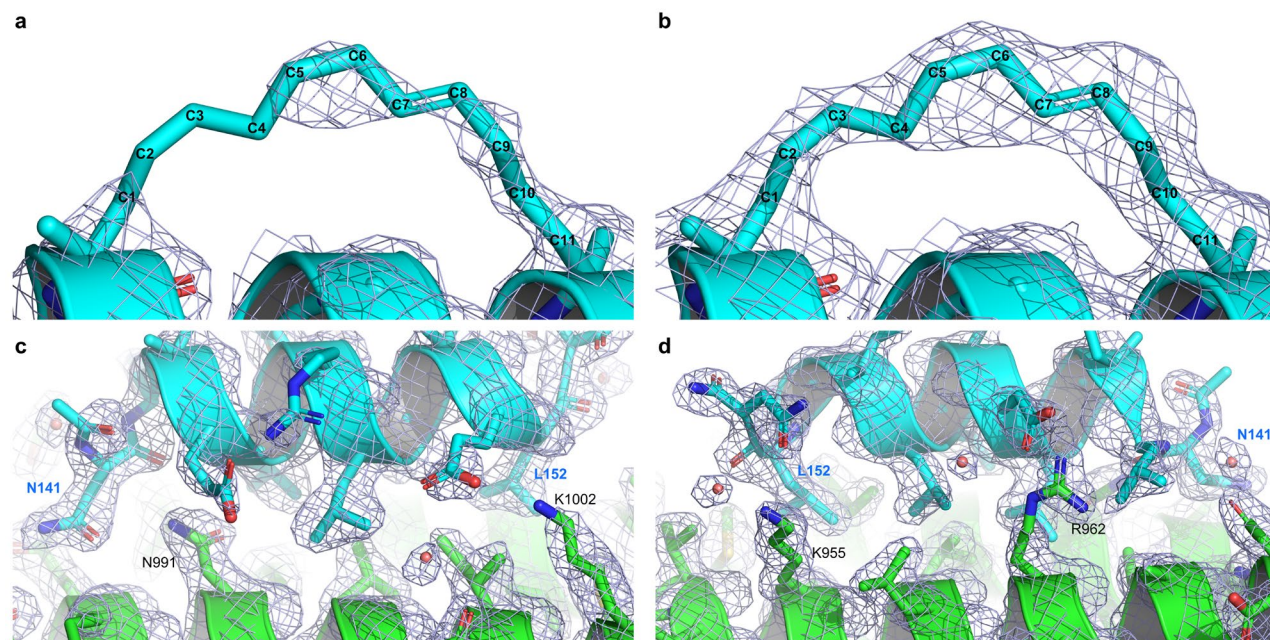

**Supplementary Fig. 10. Electron density maps of FAT-1907 X-ray co-crystal structure.** Modeling of peptide 1907 hydrocarbon-staple to electron density map at a contour level of (a) 0.85 sigma and (b) 0.25 sigma. Electron density map of the (c) anterior and (d) posterior sides of the FAT-1907 protein-peptide interface at 0.85 sigma.

**a**

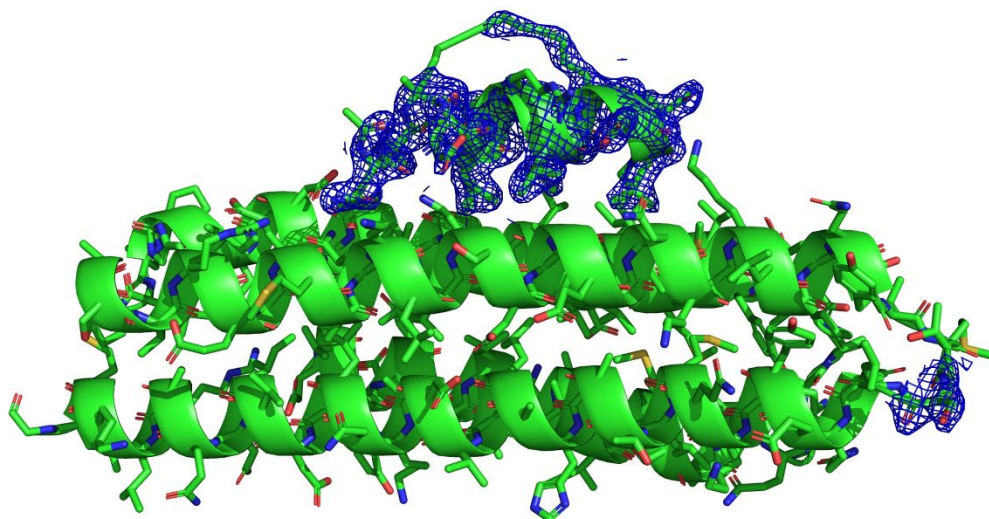

**b**

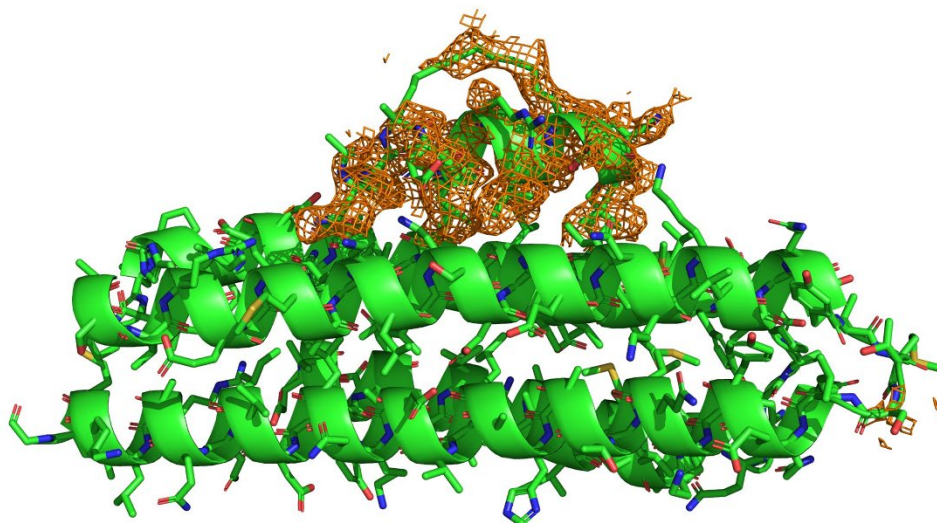

**Supplementary Fig. 11. Additional electron density maps of FAT-1907 X-ray co-crystal structure.**

**(a)** 2Fo-Fc electron density for chain B is at sigma level of 1.0 depicted (in blue). **(b)** Polder map is depicted with a contour level of 1.0 sigma (in orange).

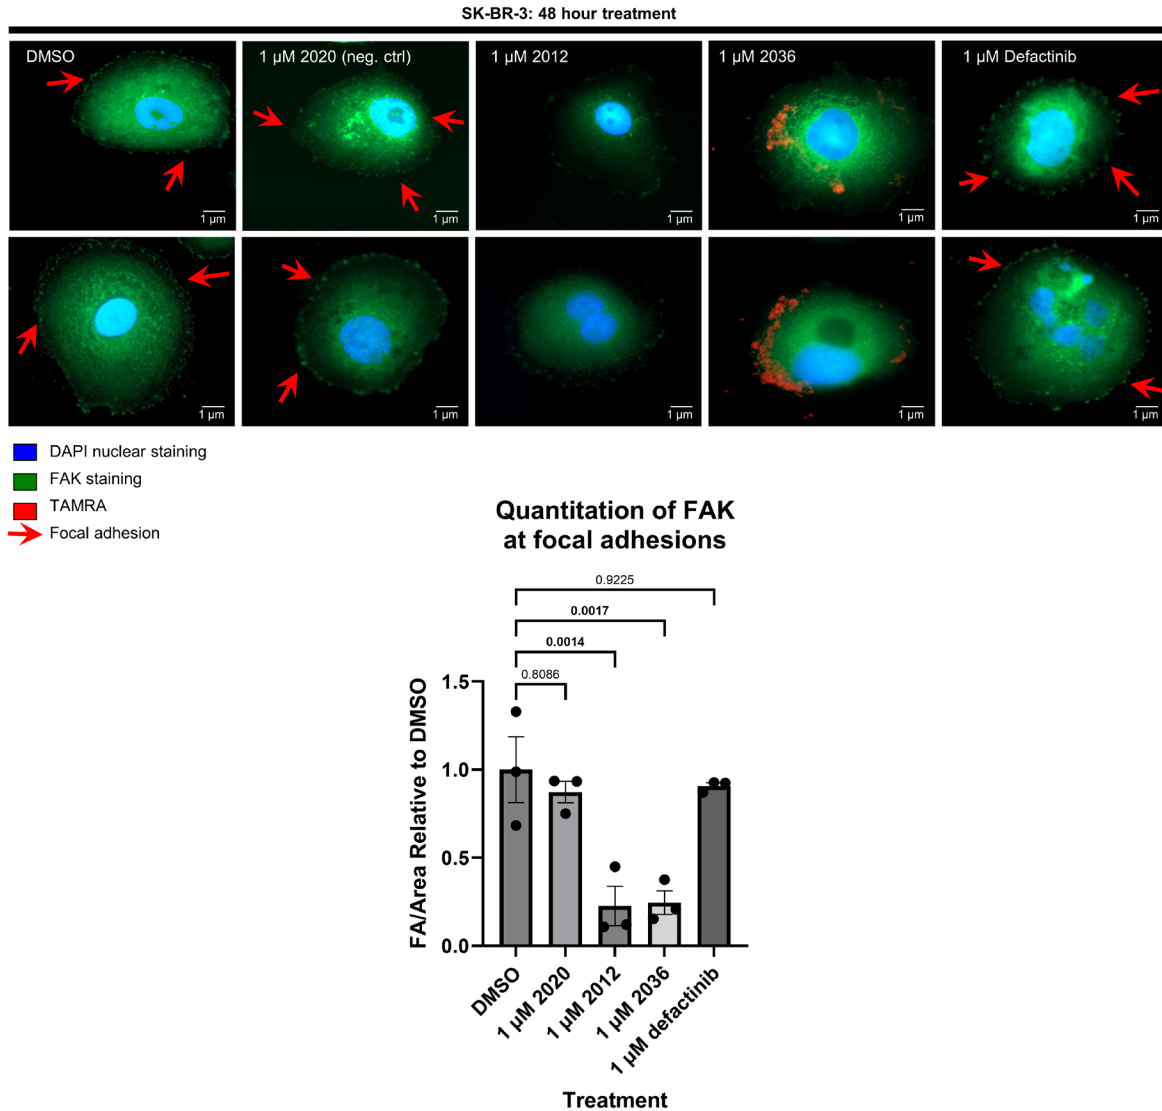

**Supplementary Fig. 12. Immunofluorescence assay showing 2012 cell permeability and de-localization of FAK from focal adhesions.** Tests were performed in SK-BR-3 breast cancer cells with 1  $\mu$ M treatment of 2020 (neg. control), 2012, 2036 (TAMRA-tagged 2012), defactinib, or vehicle (DMSO) control. Green focal adhesion foci are indicated with red arrows. Intracellular localization of 2012 was visualized using peptide 2036 (TAMRA-tagged 2012). Quantitation of focal adhesions in bar graph obtained via ImageJ analysis, bar graph made using GraphPad Prism showing mean  $\pm$  SD and corrected p-values. Bolded p-values indicate statistically significant values where  $p < 0.05$ . Three independent biological replicates ( $n=3$ ) were performed. One-way ANOVA statistical analysis and Dunnett's multiple comparisons test performed.



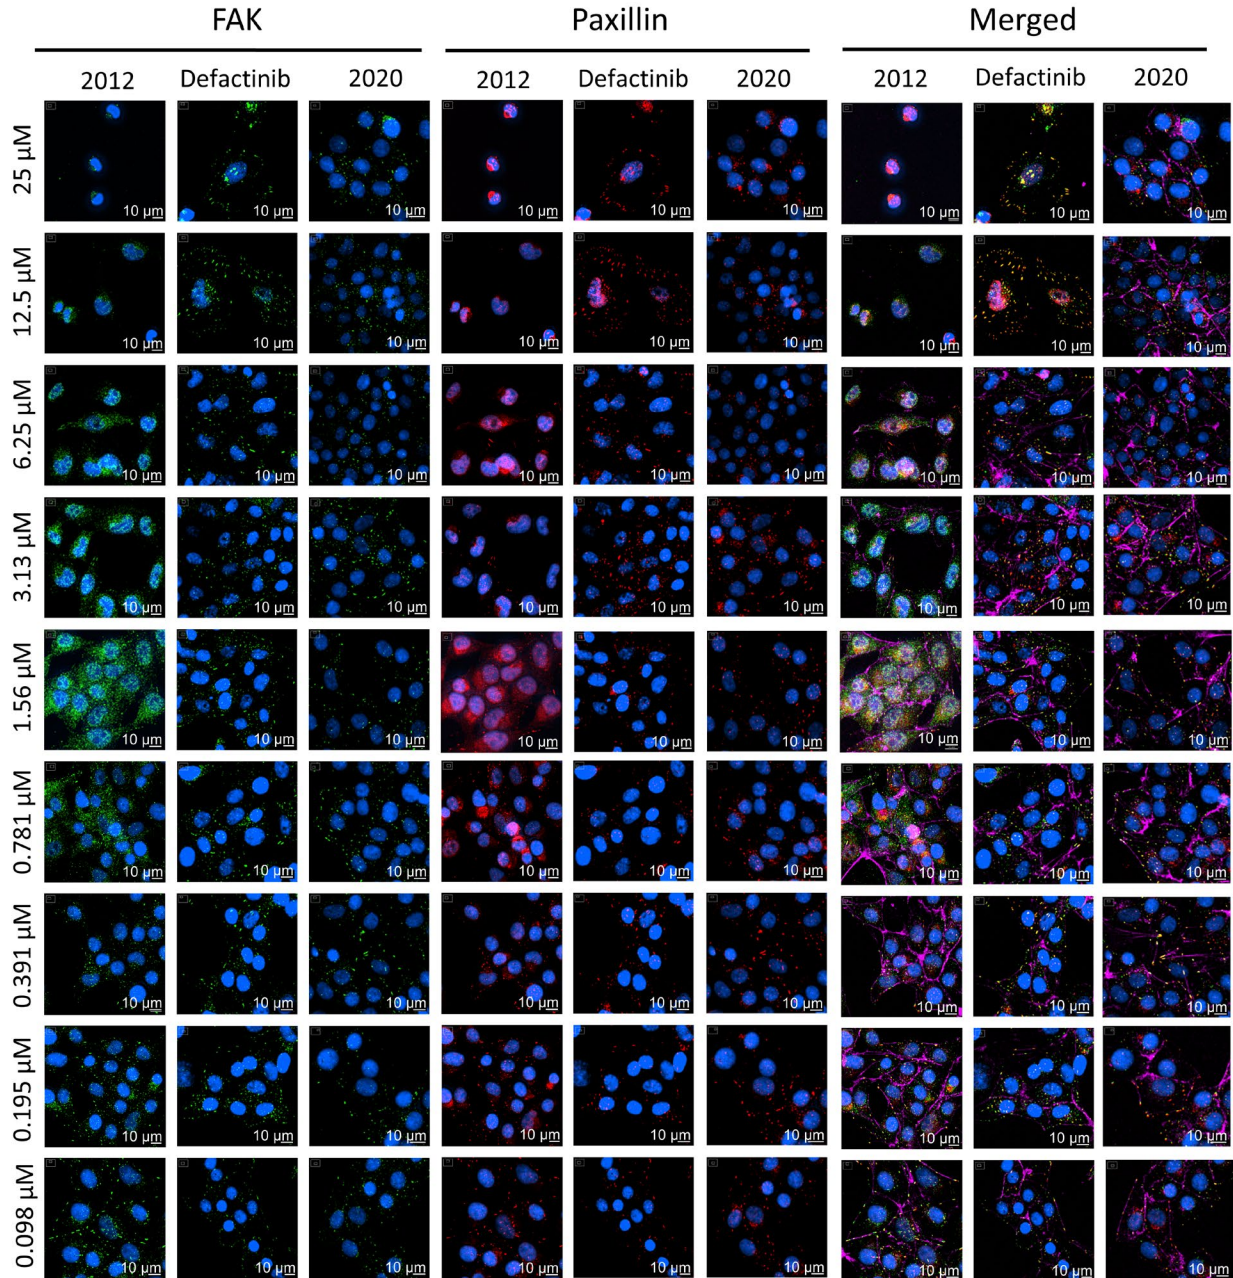

**Supplementary Fig. 13. Immunofluorescence dose response assay showing 2012 induced de-localization of FAK from focal adhesions in SK-MEL-147 cells.** Immunofluorescence staining of FAK (green), Paxillin (red), and DAPI (blue) in SK-MEL-147 melanoma cells after 48 hours of dose-response treatment 2012, defactinib, and 2020 (neg. control).

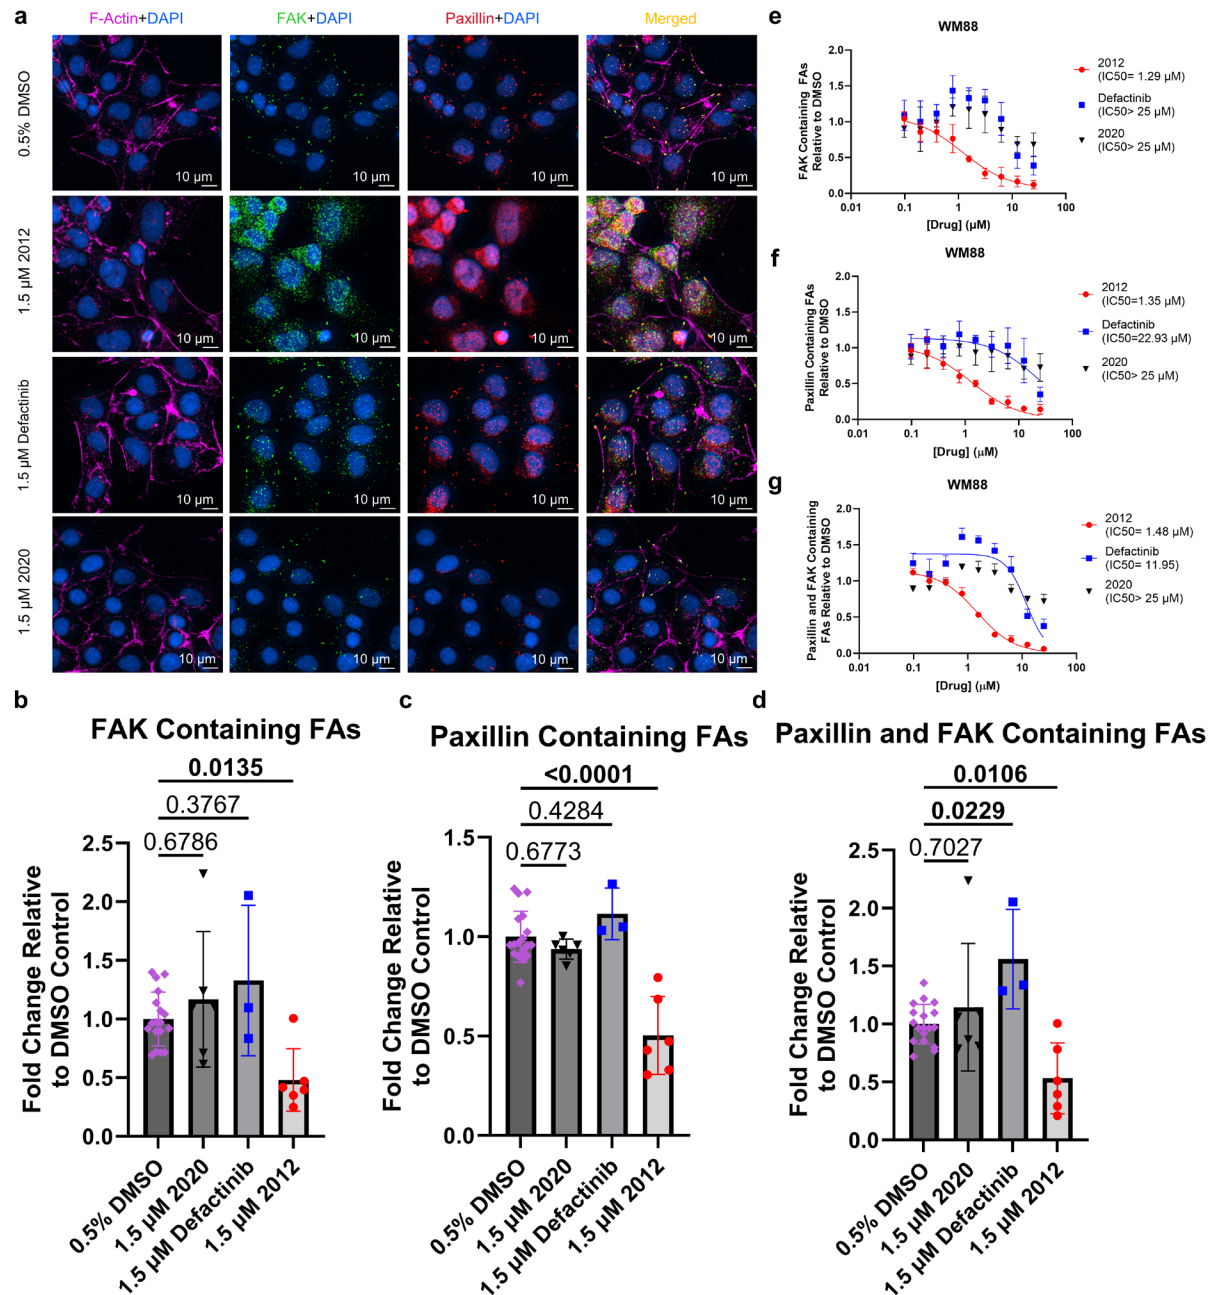

**Supplementary Fig 14. Immunofluorescence assay showing 2012 induced de-localization of FAK from focal adhesions in WM88 melanoma cells.** (a) Immunofluorescence staining of F-actin (magenta), FAK (green), Paxillin (red), and DAPI (blue) in WM88 melanoma cells after 48 hours of treatment with 1.5  $\mu$ M 2012, defactinib, and 2020 (neg. control) along with 0.5% DMSO (vehicle control) and corresponding changes in (b) FAK, (c) paxillin, and (d) dual FAK-paxillin containing focal adhesions. One-way ANOVA analyses and Dunnett's multiple comparison tests were performed in (b-d) and changes in

FA composition denoted with corrected p-values provided. Bolded p-values indicate statistically significant values where  $p < 0.05$ . Sample size for (b-d) was 18 (n=18) for DMSO (vehicle control); 6 (n=6) for 2012 and 2020 treated groups; and 3 (n=3) for defactinib treated groups. All values for 'n' represent independent biological replicates. Dose response curves showing the mean  $\pm$  SD reduction of (e) FAK, (f) paxillin, or (g) dual FAK-paxillin containing focal adhesions and corresponding  $IC_{50}$  values after 48 hours of treatment with 2012, defactinib, and 2020 relative to 0.5% DMSO control in WM88 cells. Three biological replicates were performed (n=3). All source data are provided as a Source Data file.



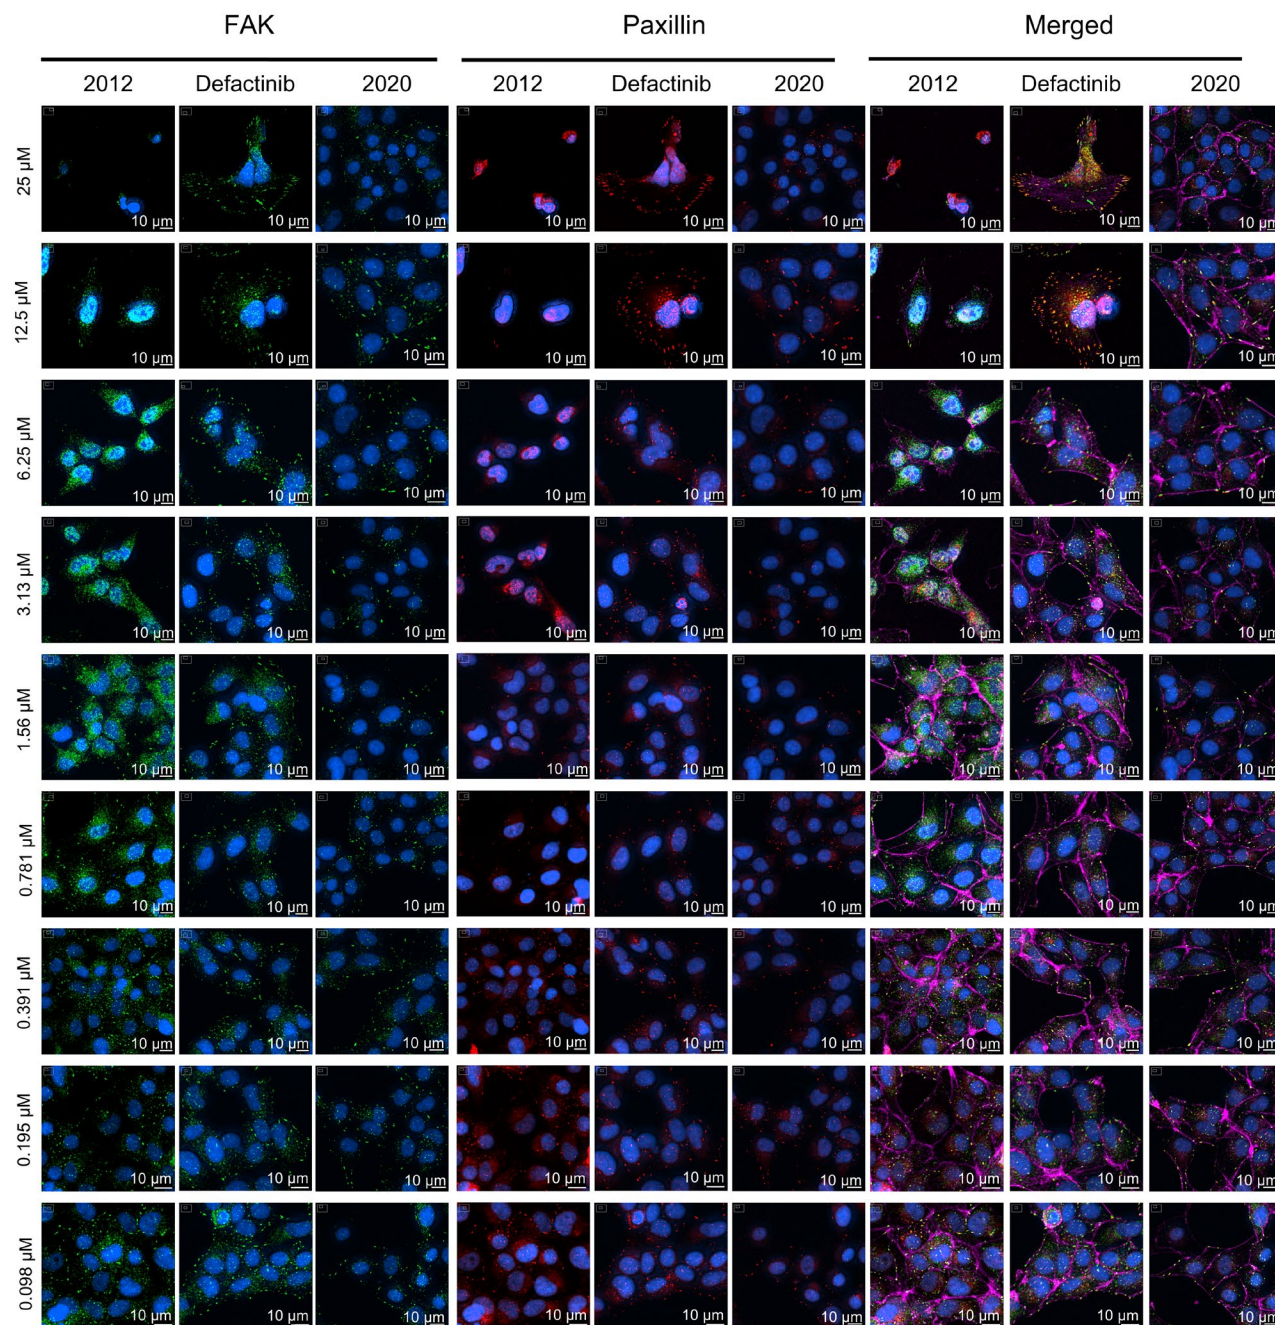

**Supplementary Fig 15. Immunofluorescence dose response assay showing 2012 induced de-localization of FAK from focal adhesions in WM88 melanoma cells.** Immunofluorescence staining of FAK (green), Paxillin (red), and DAPI (blue) in WM88 melanoma cells after 48 hours of dose-response treatment 2012, defactinib, and 2020 (neg. control).



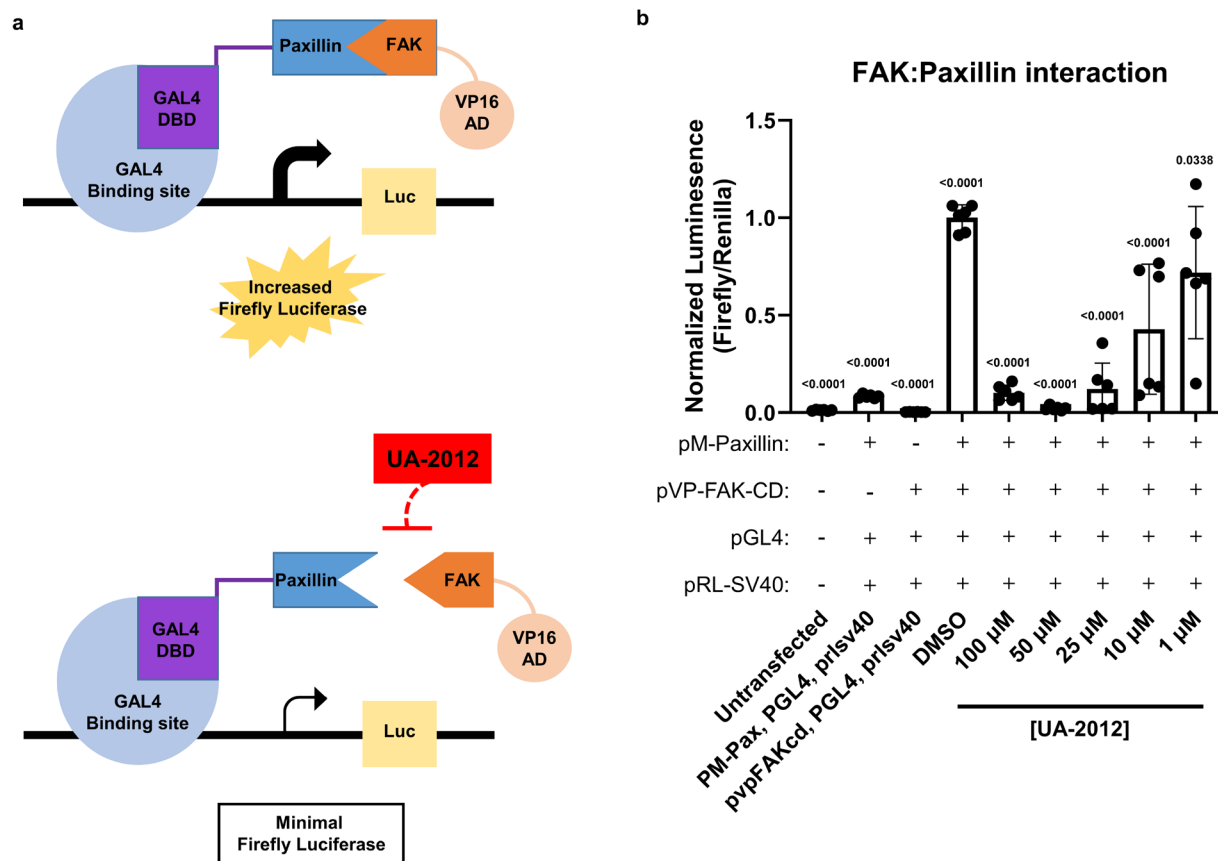

**Supplementary Fig. 16. Interaction between FAK and paxillin proteins is disrupted by 2012 treatment.** HEK293T cells, treated with 2012 (2 hour pre-treatment followed by 24 hour post-treatment), were transfected with plasmid fusion constructs for 24 hours in a mammalian 2-hybrid system to measure critical FAT-paxillin protein-protein interactions. **(a)** Graphical representation of the FAK-paxillin Mammalian 2-Hybrid System. **(b)** Mean  $\pm$  SD luminescence of various 2012 treatments compared to DMSO-vehicle control and single plasmid-transfection controls from 6 biological replicates ( $n=6$ ). Data are normalized for transfection efficiency via Renilla luciferase expression. One-way ANOVA statistical analysis and Dunnett's multiple comparisons test performed and corrected p-values reported. Bolded p-values indicate statistically significant values where  $p<0.05$ . Source data provided as Source Data file.

a

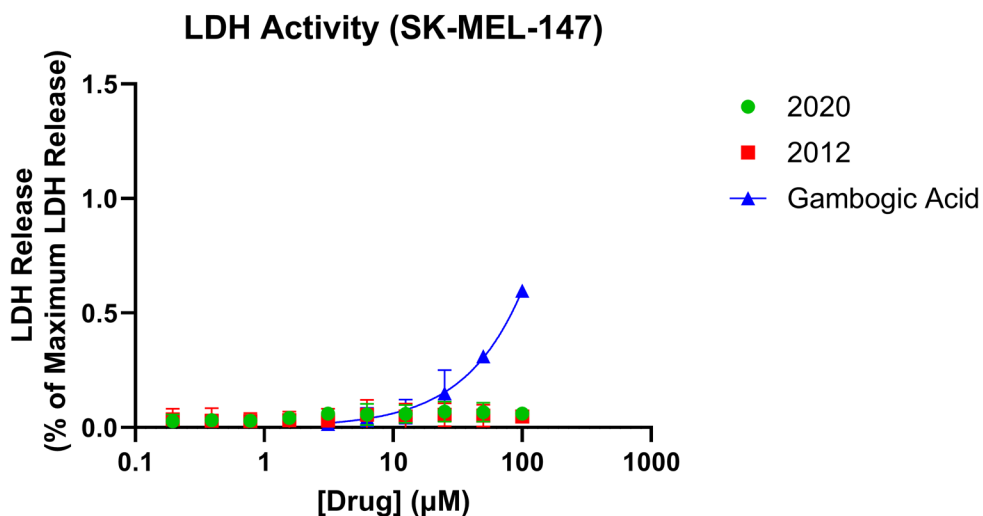

b

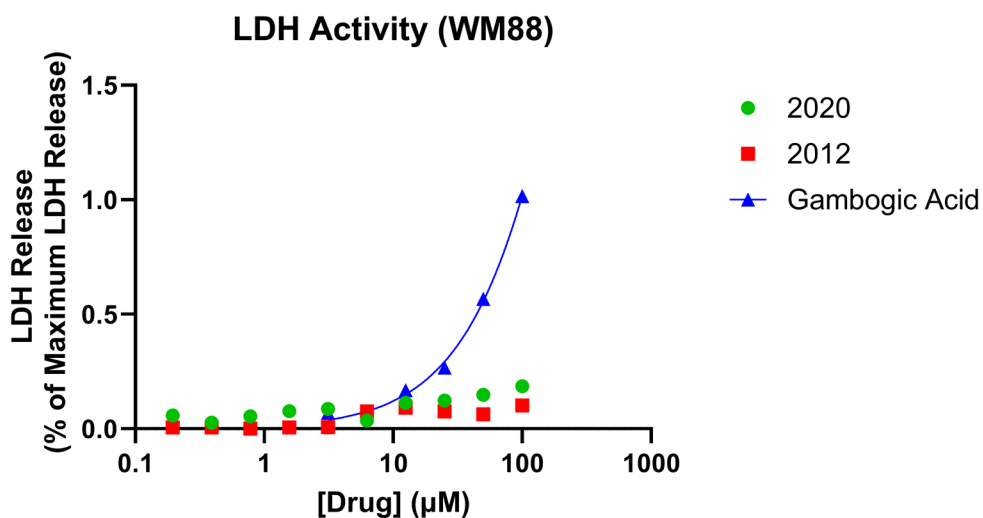

**Supplementary Fig 17. LDH release assay shows even at high micromolar doses of peptide 2012 and 2020 do not result in damage to plasma membrane.** LDH release assay performed in human melanoma cell lines (a) SK-MEL-147 and (b) WM88 using compounds 2012, 2020 (neg. control), and Gambogic Acid (pos. control) at titrating concentrations ranging from 100  $\mu\text{M}$  to 200 nM for 45 minutes. Dose response curves generated in GraphPad Prism and report mean  $\pm$  SD LDH Release relative to the maximum possible LDH release of three biological replicates (n=3). Source data are provided as Source Data file.

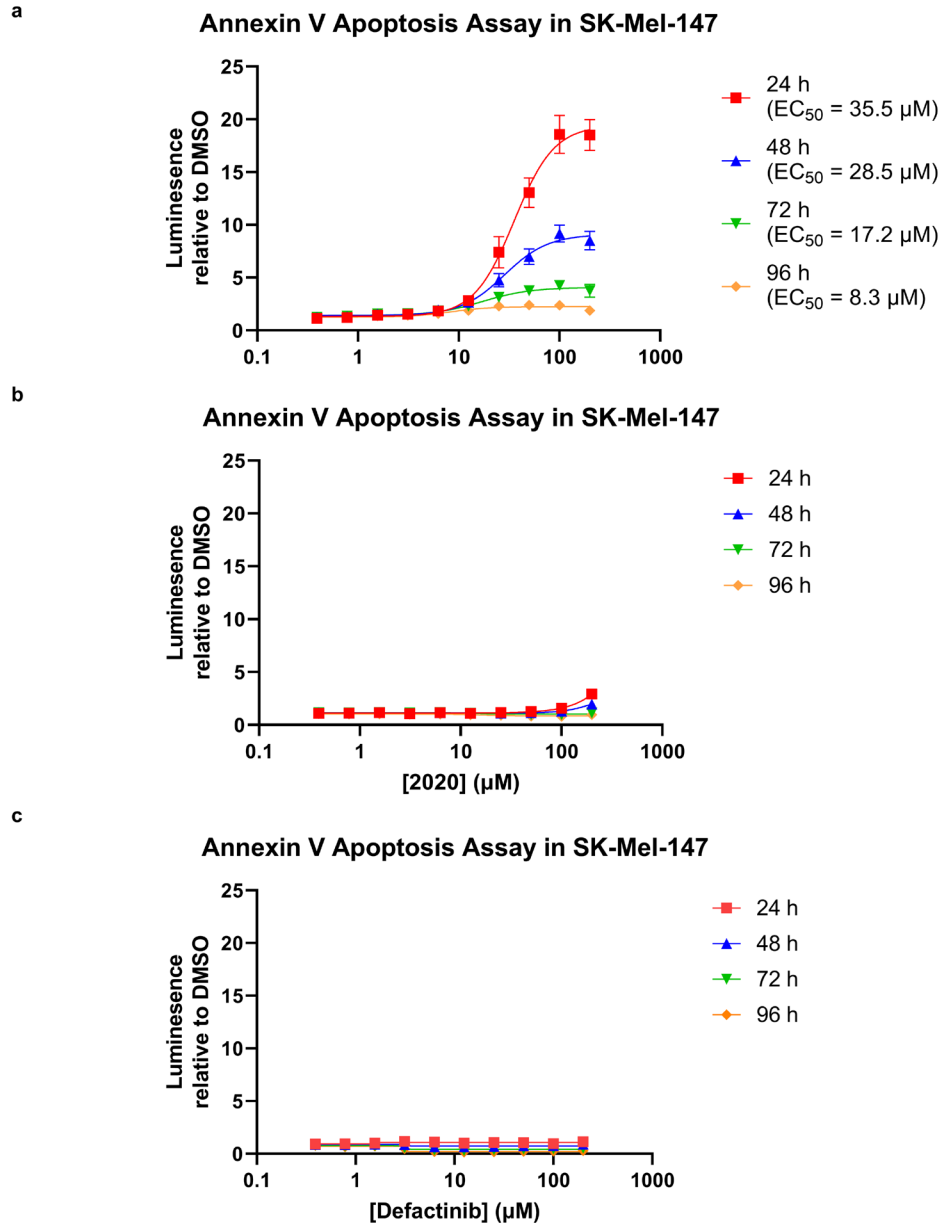

**Supplementary Fig. 18. Peptide 2012 induces apoptosis in dose-dependent and time-dependent manner via Annexin V apoptosis time-course study.** SK-MEL-147 cells treated with (a) 2012, (b) 2020, and (c) defactinib are evaluated for apoptosis using RealTime-Glo system for Annexin V binding.  $EC_{50}$  curves representing data obtained every 24 hours, over the course of 96 hours total.  $EC_{50}$  curves fit using GraphPad Prism reporting mean  $\pm$  SD of (a) 7 biological replicates ( $n=7$ ); (b) 5 biological replicates ( $n=5$ ); and (c) 5 biological replicates ( $n=5$ ). Source data are provided as Source Data files.

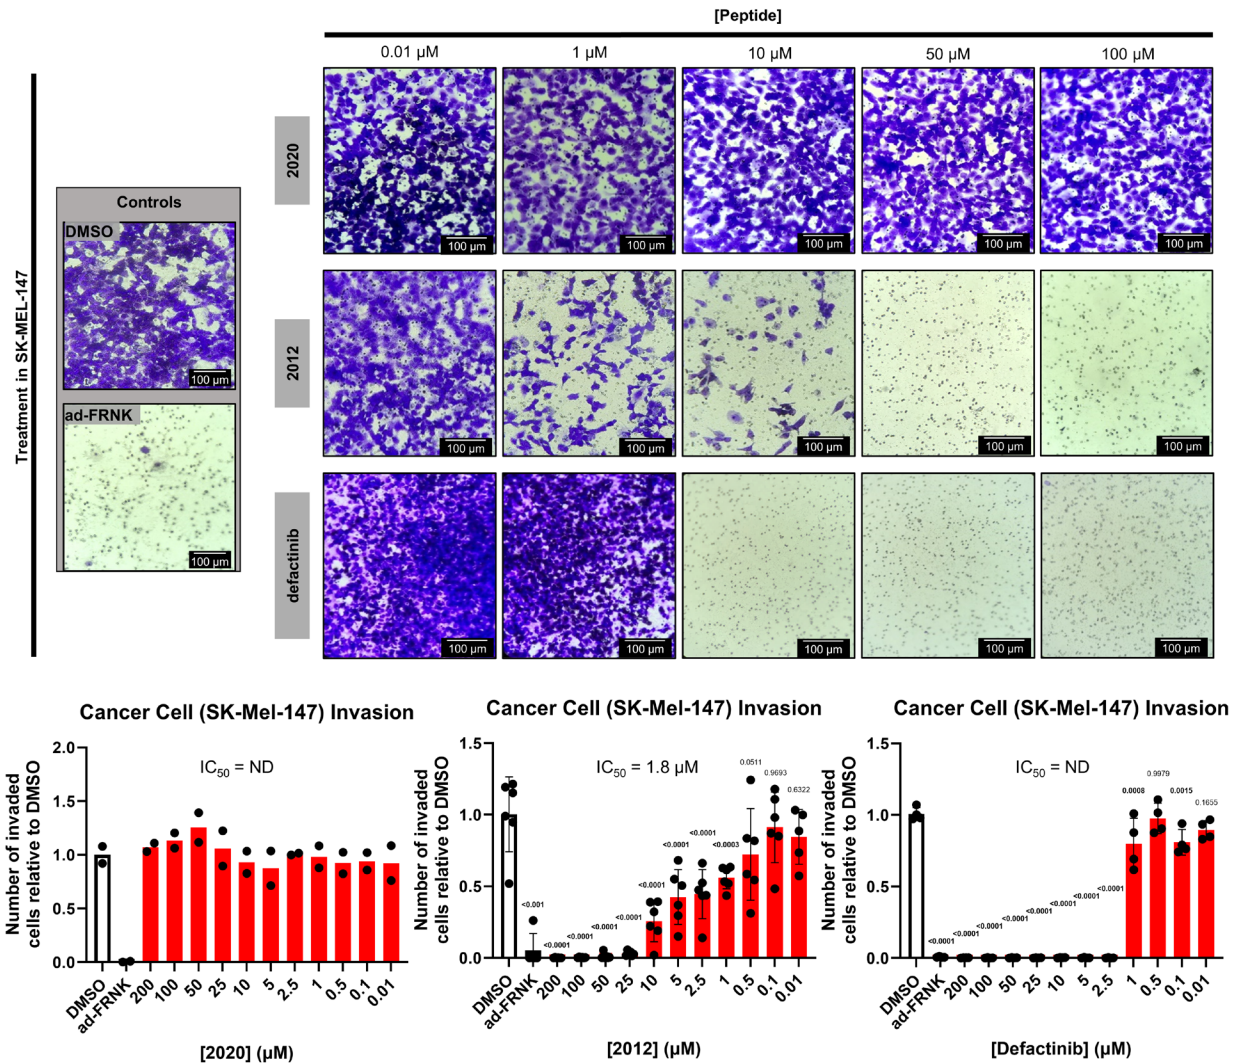

**Supplementary Fig. 19. Peptide 2012 causes dose-dependent reduction in cancer-cell invasion via Transwell invasion assay.** Representative brightfield images of invaded SK-MEL-147 cells on transwell inserts at 10X magnification following peptide treatment. Images show invaded cells after treatment with various concentrations of 2020 (top panel), 2012 (middle panel), and defactinib (bottom panel), in addition to DMSO vehicle-control (left, top panel) and ad-FRNK positive control (left, bottom panel). Bar graphs reveal mean number of invaded cells  $\pm$  SD and calculated IC<sub>50</sub> values across all doses of 2020 (left graph, n=2), 2012 (middle graph, n=6), and defactinib (right graph, n=4). All values for 'n' represent independent biological replicates. One-way ANOVA analyses and Dunnet's multiple comparison tests were performed

for 2012 and defactinib treated groups and corrected p-values are reported. Bolded p-values indicate statistically significant values where  $p < 0.05$ . All source data are provided as Source Data files.

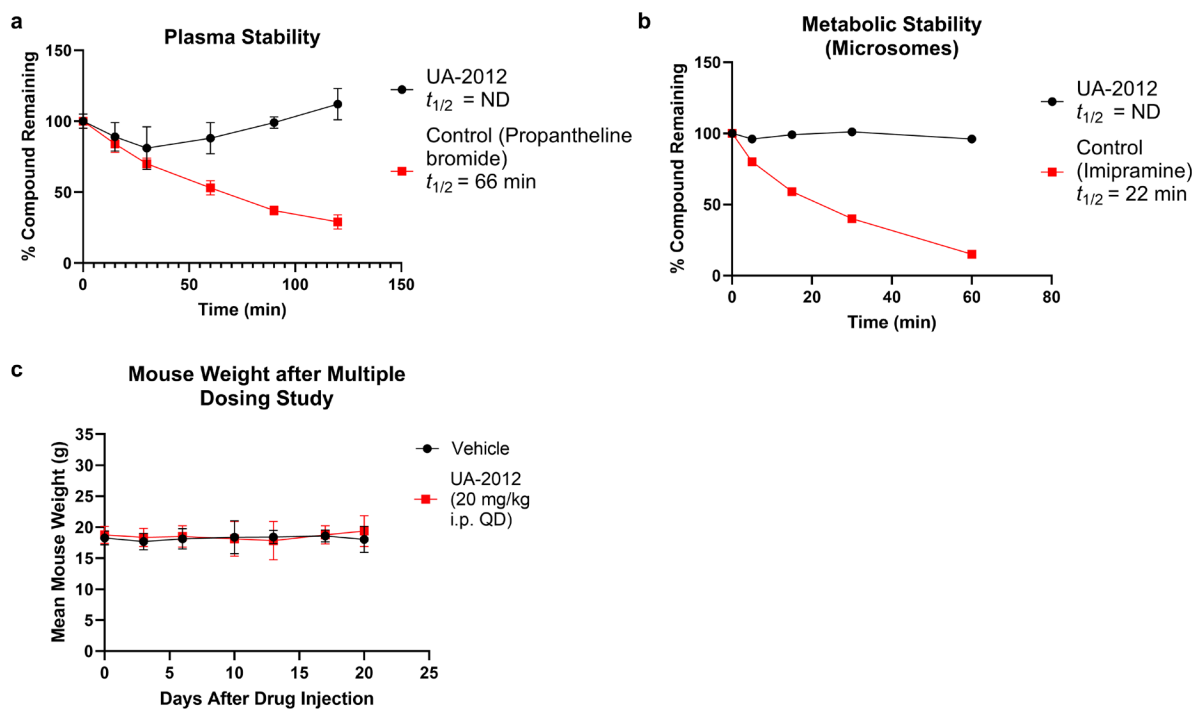

**Supplementary Fig. 20. Peptide 2012 shows promising plasma and metabolic stability and no signs of toxicity *in vivo*.** Additional DMPK assays demonstrate: **(a)** plasma stability of 2012 in mouse plasma compared to control molecule, propantheline bromide (n=3), and **(b)** microsomal stability of 2012 and control molecule, imipramine, in mouse liver microsomes (n=2). **(c)** Curves obtained from B16F10 syngeneic mouse model of melanoma indicating mean mouse body weight  $\pm$  SD (n = 8) during 2012 and vehicle-control treatments, a measure of possible toxicity and tolerance to treatments. All values for ‘n’ represent independent biological replicates. Source data are provided as Source Data files.

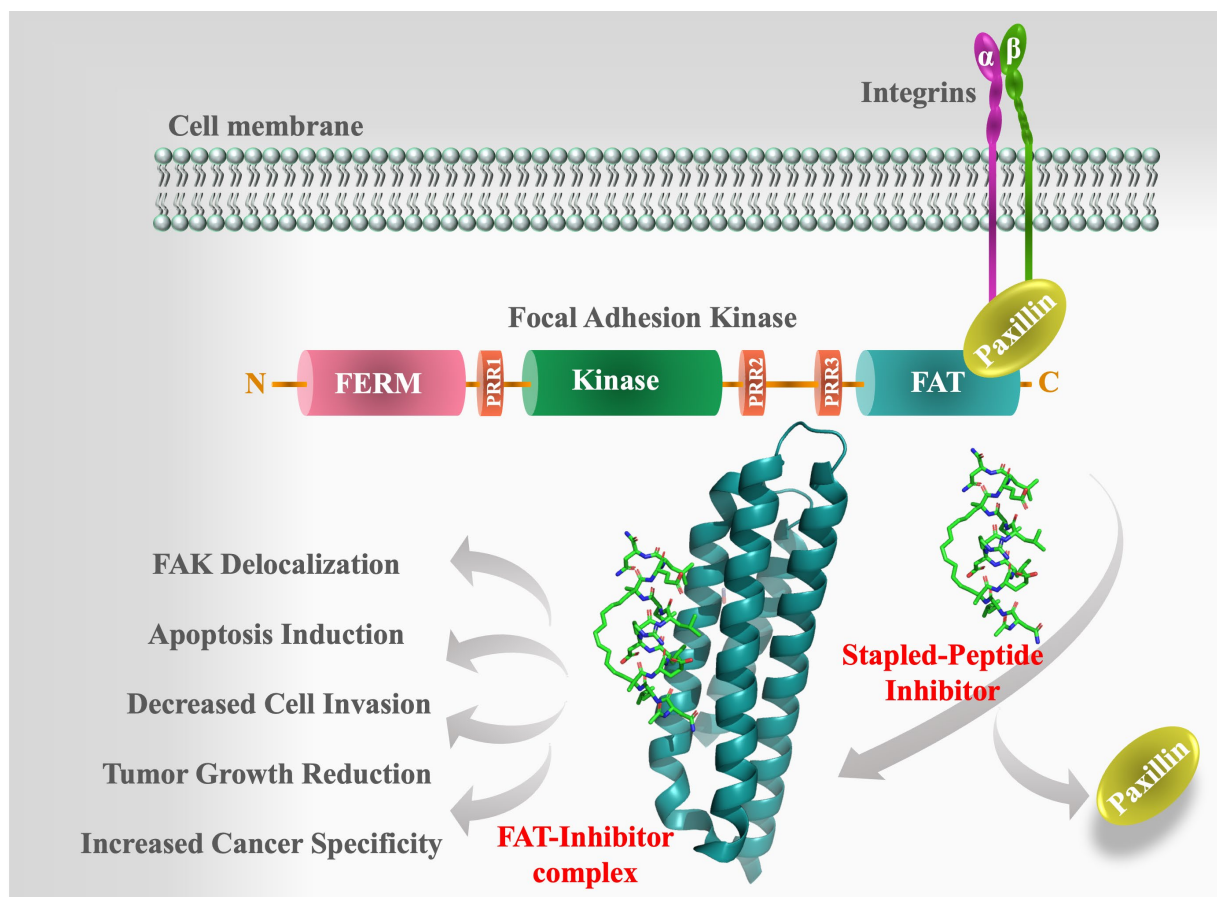

**Supplementary Fig. 21. Summary Figure: discovery of hydrocarbon-stapled paxillin mimetics with improved anti-cancer efficacy and selectivity compared to first-generation kinase-domain inhibitors.** Herein, we describe the structure-based optimization and synthesis of a series of hydrocarbon-stapled paxillin mimetics. We report the X-ray co-crystal structure of a FAK-scaffold inhibitor bound to its cognate target domain (FAT domain, PDB 6PW8). These peptides displayed anti-cancer biology not previously observed with first-generation FAK-kinase domain inhibitors, including FAK delocalization from focal adhesions, induction of apoptosis, dose-dependent inhibition of invasion, and high cancer: normal cell selectivity.

| ID   | Synonyms                                                                   | Exact mass | Mass obs | Mass theor | Mass assign                | Mass method |
|------|----------------------------------------------------------------------------|------------|----------|------------|----------------------------|-------------|
| LD2  | Ac-NLSELDRLLELN-NH <sub>2</sub>                                            | 1581.87    | 792.1    | 791.94     | 1/2*[M+2H] <sup>2+</sup>   | ESI+        |
| 1907 | Ac-NLR <sub>8</sub> ELDRLLS <sub>5</sub> ELN-NH <sub>2</sub>               | 1673.97    | 838.1    | 837.99     | 1/2*[M+2H] <sup>2+</sup>   | ESI+        |
| 1914 | Ac-NLSE <sub>8</sub> DRLLS <sub>5</sub> N-NH <sub>2</sub>                  | 1647.92    | 825.1    | 824.97     | 1/2*[M+2H] <sup>2+</sup>   | ESI+        |
| 1919 | Ac-NLSE <sub>5</sub> DRLLS <sub>5</sub> ELN-NH <sub>2</sub>                | 1605.87    | 804.0    | 803.94     | 1/2*[M+2H] <sup>2+</sup>   | ESI+        |
| 1921 | Ac-NLSELDRLR <sub>5</sub> LS <sub>5</sub> N-NH <sub>2</sub>                | 1605.87    | 804.0    | 803.94     | 1/2*[M+2H] <sup>2+</sup>   | ESI+        |
| 2015 | Ac-NLSELD <sub>5</sub> DRLLS <sub>5</sub> N-NH <sub>2</sub>                | 1605.87    | 804.1    | 803.94     | 1/2*[M+2H] <sup>2+</sup>   | ESI+        |
| 1925 | Ac-NLSE <sub>8</sub> DRAALS <sub>5</sub> N-NH <sub>2</sub>                 | 1563.83    | 783.0    | 782.92     | 1/2*[M+2H] <sup>2+</sup>   | ESI+        |
| 1931 | Ac-NLRE <sub>5</sub> DRLLS <sub>5</sub> RELN-NH <sub>2</sub>               | 1717.96    | 860.5    | 859.99     | 1/2*[M+2H] <sup>2+</sup>   | ESI+        |
| 1905 | Ac-NLSR <sub>8</sub> LDRLLS <sub>5</sub> LN-NH <sub>2</sub>                | 1616.00    | 809.1    | 809.01     | 1/2*[M+2H] <sup>2+</sup>   | ESI+        |
| 2017 | Ac-NR <sub>8</sub> ELDRLS <sub>5</sub> ELN-NH <sub>2</sub>                 | 1648.90    | 825.1    | 825.46     | 1/2*[M+2H] <sup>2+</sup>   | ESI+        |
| 1906 | H-NLSR <sub>8</sub> LDRLLS <sub>5</sub> LN-NH <sub>2</sub>                 | 1574.95    | 788.6    | 788.48     | 1/2*[M+2H] <sup>2+</sup>   | ESI+        |
| 1910 | Ac-NLR <sub>8</sub> QLDRLLS <sub>5</sub> QLN-NH <sub>2</sub>               | 1672.00    | 848.1    | 848.00     | 1/2*[M+H+Na] <sup>2+</sup> | ESI+        |
| 1912 | Ac-NLAibELDRLAibELN-NH <sub>2</sub>                                        | 1551.86    | 777.1    | 776.94     | 1/2*[M+2H] <sup>2+</sup>   | ESI+        |
| 1913 | Ac-DLR <sub>8</sub> ELDRLLS <sub>5</sub> ELD-NH <sub>2</sub>               | 1675.94    | 839.5    | 838.98     | 1/2*[M+2H] <sup>2+</sup>   | ESI+        |
| 1920 | Ac-SLGSNLR <sub>8</sub> ELDRLLS <sub>5</sub> ELNAVQH-NH <sub>2</sub>       | 2453.36    | 1227.9   | 1227.69    | 1/2*[M+2H] <sup>2+</sup>   | ESI+        |
| 1928 | Ac-RRNL <sub>8</sub> ELDRLLS <sub>5</sub> ELNRR-NH <sub>2</sub>            | 2298.38    | 2301.9   | 2299.38    | [M+H] <sup>+</sup>         | MALDI       |
| 1933 | Ac-NLR <sub>8</sub> EWDRLLS <sub>5</sub> EWN-NH <sub>2</sub>               | 1819.96    | 911.1    | 910.99     | 1/2*[M+2H] <sup>2+</sup>   | ESI+        |
| 2007 | Ac-NLR <sub>8</sub> ELDRLWS <sub>5</sub> ELN-NH <sub>2</sub>               | 1746.97    | 874.6    | 874.49     | 1/2*[M+2H] <sup>2+</sup>   | ESI+        |
| 2009 | Ac-NLR <sub>8</sub> ALDRLLS <sub>5</sub> ELN-NH <sub>2</sub>               | 1615.97    | 809.1    | 808.99     | 1/2*[M+2H] <sup>2+</sup>   | ESI+        |
| 2010 | Ac-NLR <sub>8</sub> ALDALLS <sub>5</sub> ELN-NH <sub>2</sub>               | 1530.90    | 766.6    | 766.46     | 1/2*[M+2H] <sup>2+</sup>   | ESI+        |
| 2011 | Ac-R <sub>8</sub> ELDRLLS <sub>5</sub> -NH <sub>2</sub>                    | 1090.68    | 1093.5   | 1091.68    | [M+H] <sup>+</sup>         | MALDI       |
| 2013 | Ac-NLR <sub>8</sub> *ELDRLLS <sub>5</sub> *ELN-NH <sub>2</sub> (unstapled) | 1702.00    | 852.1    | 852.01     | 1/2*[M+2H] <sup>2+</sup>   | ESI+        |
| 2014 | Ac-NLR <sub>8</sub> EEDRLLS <sub>5</sub> EEN-NH <sub>2</sub>               | 1705.89    | 854.1    | 853.95     | 1/2*[M+2H] <sup>2+</sup>   | ESI+        |
| 2016 | RhoB-NLR <sub>8</sub> ELDRLLS <sub>5</sub> ELN-NH <sub>2</sub>             | 2128.22    | 710.3    | 710.41     | 1/3*[M+3H] <sup>3+</sup>   | ESI+        |
| 1917 | Ac-SATRES <sub>5</sub> DELS <sub>8</sub> ASLSD-NH <sub>2</sub>             | 1683.83    | 843.0    | 842.92     | 1/2*[M+2H] <sup>2+</sup>   | ESI+        |

**Supplementary Table. 1. Mass spectral characterization used for confirmation of successful stapled peptide synthesis.** Each peptide (1-19) used in this inquiry is tabulated by its UA database identifier, synonymous sequence, and exact mass. Theoretical spectral ions, calculated by their assignment formulae, compare with excellent accuracy to observed values. Most peptides were sampled by positive-polarity ESI, although MALDI was used for peptides 1928 and 2011. A single LC/MS run (n=1) was performed for each analyte.



| FAT <sub>919</sub> - 1907 (6PW8)                              |                                                |
|---------------------------------------------------------------|------------------------------------------------|
| <b>Data Collection</b>                                        |                                                |
| Space Group                                                   | P 2 <sub>1</sub> 2 <sub>1</sub> 2 <sub>1</sub> |
| Cell Dimensions                                               |                                                |
| <i>a</i> , <i>b</i> , <i>c</i> (Å)                            | 47.49, 53.09, 53.42                            |
| $\alpha$ , $\beta$ , $\gamma$ (°)                             | 90, 90, 90                                     |
| Resolution (Å)                                                | 47.49 - 1.62 (1.65 - 1.62)                     |
| <i>R</i> <sub>merge</sub>                                     | 0.159 (17.5)                                   |
| <i>I</i> / $\sigma$ <i>I</i>                                  | 8.1 (0.1)                                      |
| Completeness (%)                                              | 90.3 (38.9)                                    |
| Redundancy                                                    | 7 (1.7)                                        |
| <b>Refinement</b>                                             |                                                |
| Resolution (Å)                                                | 37.66 - 1.95                                   |
| No. Reflections                                               | 10289                                          |
| <i>R</i> <sub>work</sub> / <i>R</i> <sub>free</sub>           | 0.2172 / 0.2495                                |
| No. Atoms                                                     |                                                |
| Protein                                                       | 1070                                           |
| Water                                                         | 92                                             |
| Other                                                         | 27                                             |
| <i>B</i> -factors                                             |                                                |
| Protein                                                       | 37.47                                          |
| Water                                                         | 40.92                                          |
| Other                                                         | 51.31                                          |
| R.m.s Deviations                                              |                                                |
| Bond Lengths (Å)                                              | 0.010                                          |
| Bond Angles (°)                                               | 1.123                                          |
| Number of xtals used in FAT <sub>919</sub> - 1907 data-set: 1 |                                                |
| * Values in parentheses are for highest-resolution shell.     |                                                |

**Supplementary Table 2. Data collection and refinement statistics (molecular replacement) of FAT-1907 X-ray co-crystal structure (PDB 6PW8) [<https://doi.org/10.2210/pdb6PW8/pdb>].**

| FAT      |        |      |       | 1907     |        |      |       | Distance | aaProperty |      |
|----------|--------|------|-------|----------|--------|------|-------|----------|------------|------|
| Res Name | Res ID | Atom | Chain | Res Name | Res ID | Atom | Chain | (Å)      | FAT        | 1907 |
| LEU      | 965    | CD1  | A     | ASN      | 1      | O    | B     | 3.94     | phob       | phil |
| GLU      | 984    | O    | A     | ASN      | 1      | ND2  | B     | 3.65     | phil       | phil |
| GLN      | 987    | CB   | A     | ASN      | 1      | ND2  | B     | 3.90     | phil       | phil |
| LYS      | 988    | CA   | A     | ASN      | 1      | OD1  | B     | 3.25     | phil       | phil |
| ASN      | 991    | ND2  | A     | ASN      | 1      | O    | B     | 2.87     | phil       | phil |
| ARG      | 962    | NH2  | A     | LEU      | 2      | CD1  | B     | 3.78     | phil       | phob |
| LEU      | 965    | CB   | A     | LEU      | 2      | CD1  | B     | 4.00     | phob       | phob |
| ASP      | 969    | OD1  | A     | LEU      | 2      | CD2  | B     | 3.68     | phil       | phob |
| ASN      | 991    | ND2  | A     | GLU      | 4      | CG   | B     | 3.70     | phil       | phil |
| LEU      | 961    | CG   | A     | LEU      | 5      | CD2  | B     | 3.63     | phob       | phob |
| ARG      | 962    | CA   | A     | LEU      | 5      | CD2  | B     | 3.39     | phil       | phob |
| LEU      | 965    | CD1  | A     | LEU      | 5      | CD2  | B     | 3.59     | phob       | phob |
| ASN      | 991    | OD1  | A     | LEU      | 5      | CB   | B     | 3.32     | phil       | phob |
| LEU      | 994    | CD2  | A     | LEU      | 5      | CD1  | B     | 3.31     | phob       | phob |
| ARG      | 962    | NH1  | A     | ASP      | 6      | OD2  | B     | 2.98     | phil       | phil |
| ASN      | 991    | O    | A     | LEU      | 8      | CD1  | B     | 3.34     | phil       | phob |
| GLY      | 995    | N    | A     | LEU      | 8      | CD1  | B     | 3.67     | phob       | phob |
| ILE      | 998    | CD1  | A     | LEU      | 8      | O    | B     | 3.73     | phob       | phob |
| GLY      | 958    | CA   | A     | LEU      | 9      | CD2  | B     | 3.84     | phob       | phob |
| LEU      | 959    | CD2  | A     | LEU      | 9      | CD1  | B     | 3.63     | phob       | phob |
| LEU      | 994    | CD2  | A     | LEU      | 9      | CD2  | B     | 3.96     | phob       | phob |
| LYS      | 1002   | NZ   | A     | GLU      | 11     | OE2  | B     | 2.80     | phil       | phil |
| VAL      | 951    | CG1  | A     | LEU      | 12     | O    | B     | 3.71     | phob       | phob |
| VAL      | 954    | CG1  | A     | LEU      | 12     | CD2  | B     | 3.72     | phob       | phob |
| LYS      | 955    | CA   | A     | LEU      | 12     | CD1  | B     | 3.91     | phil       | phob |
| LYS      | 955    | NZ   | A     | ASN      | 13     | OD1  | B     | 3.24     | phil       | phil |

**Supplementary Table 3. FAT-1907 (6PW8) [<https://doi.org/10.2210/pdb6PW8/pdb>] interactions  $\leq 4$  Å at the protein-peptide interface.**

| FAT      |        |      |       | LD2      |        |      |       | Distance<br>(Å) | aaProperty |      |
|----------|--------|------|-------|----------|--------|------|-------|-----------------|------------|------|
| Res Name | Res ID | Atom | Chain | Res Name | Res ID | Atom | Chain |                 | FAT        | LD2  |
| ARG      | 962    | CA   | C     | LEU      | 5      | CD2  | F     | 3.91            | phil       | phob |
| LEU      | 965    | CD1  | C     | LEU      | 5      | CD2  | F     | 3.80            | phob       | phob |
| ASN      | 991    | OD1  | C     | LEU      | 5      | CD1  | F     | 3.35            | phil       | phob |
| LEU      | 994    | CD2  | C     | LEU      | 5      | CD1  | F     | 3.48            | phob       | phob |
| ARG      | 962    | NH2  | C     | ASP      | 6      | OD1  | F     | 3.11            | phil       | phil |
| ILE      | 998    | CD1  | C     | LEU      | 8      | CB   | F     | 3.76            | phob       | phob |
| LYS      | 955    | NZ   | C     | LEU      | 9      | O    | F     | 3.23            | phil       | phob |
| GLY      | 958    | O    | C     | LEU      | 9      | CD2  | F     | 3.44            | phob       | phob |
| ARG      | 962    | CD   | C     | LEU      | 9      | CD1  | F     | 3.95            | phil       | phob |
| ILE      | 998    | CG2  | C     | GLU      | 11     | OE1  | F     | 3.63            | phob       | phil |
| LYS      | 1002   | NZ   | C     | GLU      | 11     | OE2  | F     | 2.53            | phil       | phil |
| VAL      | 951    | O    | C     | LEU      | 12     | CD2  | F     | 3.59            | phob       | phob |
| VAL      | 954    | CG1  | C     | LEU      | 12     | CD1  | F     | 3.73            | phob       | phob |
| LYS      | 955    | CA   | C     | LEU      | 12     | CD1  | F     | 3.17            | phil       | phob |
| MET      | 1001   | CE   | C     | LEU      | 12     | CD2  | F     | 3.41            | phob       | phob |
| LYS      | 955    | NZ   | C     | ASN      | 13     | OD1  | F     | 3.15            | phil       | phil |

**Supplementary Table 4. FAT-LD2 (1OW8) [<https://doi.org/10.2210/pdb1OW8/pdb>] interactions  $\leq 4$  Å at the protein-peptide interface.**

**a**

| Target                      | 2012               | Defactinib         | Target                     | 2012               | Defactinib         |
|-----------------------------|--------------------|--------------------|----------------------------|--------------------|--------------------|
| Gene Symbol                 | % Ctrl @ 1 $\mu$ M | % Ctrl @ 1 $\mu$ M | Gene Symbol                | % Ctrl @ 1 $\mu$ M | % Ctrl @ 1 $\mu$ M |
| ABL1 (E255K)-phosphorylated | 70                 | 82                 | KIT(V559D,T670I)           | 93                 | 37                 |
| ABL (T315I)-phosphorylated  | 100                | 4.9                | LKB1                       | 85                 | 90                 |
| ABL1-nonphosphorylated      | 56                 | 37                 | MAP3K4                     | 90                 | 69                 |
| ABL1-phosphorylated         | 80                 | 51                 | MAPKAPK2                   | 100                | 100                |
| ACVR1B                      | 81                 | 83                 | MARK3                      | 91                 | 50                 |
| ADCK3                       | 100                | 93                 | MEK1                       | 94                 | 83                 |
| AKT1                        | 100                | 100                | MEK2                       | 79                 | 64                 |
| AKT2                        | 93                 | 95                 | MET                        | 100                | 15                 |
| ALK                         | 100                | 32                 | MKNK1                      | 100                | 100                |
| AURKA                       | 100                | 3.9                | MKNK2                      | 100                | 100                |
| AURKB                       | 100                | 13                 | MLK1                       | 100                | 6.7                |
| AXL                         | 74                 | 3.6                | p38-alpha                  | 98                 | 100                |
| BMPR2                       | 100                | 25                 | p38-beta                   | 98                 | 89                 |
| BRAF                        | 100                | 100                | PAK1                       | 100                | 65                 |
| BRAF (V600E)                | 100                | 100                | PAK2                       | 100                | 45                 |
| BTK                         | 100                | 100                | PAK4                       | 100                | 7.4                |
| CDK11                       | 87                 | 97                 | PCTK1                      | 100                | 48                 |
| CDK2                        | 88                 | 63                 | PDGFRA                     | 100                | 82                 |
| CDK3                        | 89                 | 62                 | PDGFRB                     | 94                 | 18                 |
| CDK7                        | 69                 | 22                 | PDPK1                      | 99                 | 50                 |
| CDK9                        | 100                | 90                 | PIK3C2B                    | 100                | 100                |
| CHEK1                       | 98                 | 99                 | PIK3CA                     | 100                | 100                |
| CSF1R                       | 95                 | 72                 | PIK3CG                     | 99                 | 85                 |
| CSNK1D                      | 97                 | 93                 | PIM1                       | 100                | 73                 |
| CSNK1G2                     | 99                 | 39                 | PIM2                       | 100                | 100                |
| DCAMKL1                     | 86                 | 47                 | PIM3                       | 100                | 40                 |
| DYRK1B                      | 91                 | 14                 | PKAC-alpha                 | 91                 | 72                 |
| EGFR                        | 93                 | 92                 | PLK1                       | 89                 | 17                 |
| EGFR(L858R)                 | 99                 | 81                 | PLK3                       | 94                 | 28                 |
| EPHA2                       | 98                 | 86                 | PLK4                       | 97                 | 39                 |
| ERBB2                       | 55                 | 65                 | PRKCE                      | 53                 | 42                 |
| ERBB4                       | 83                 | 100                | RAF1                       | 81                 | 86                 |
| ERK1                        | 100                | 88                 | RET                        | 99                 | 12                 |
| FAK                         | 96                 | 0.1                | RIOK2                      | 91                 | 50                 |
| FGFR2                       | 90                 | 43                 | ROCK2                      | 100                | 43                 |
| FGFR3                       | 95                 | 45                 | RSK2(Kin.Dom.1-N-terminal) | 100                | 9.9                |
| FLT3                        | 93                 | 1.1                | SNARK                      | 100                | 13                 |
| GSK3B                       | 100                | 75                 | SRC                        | 99                 | 36                 |
| IGF1R                       | 100                | 71                 | SRPK3                      | 79                 | 47                 |
| IKK-alpha                   | 100                | 100                | TGFBR1                     | 93                 | 91                 |
| IKK-beta                    | 100                | 100                | TIE2                       | 98                 | 41                 |
| INSR                        | 100                | 61                 | TRKA                       | 100                | 1                  |
| JAK2(JH1domain-catalytic)   | 87                 | 0.1                | TSSK1B                     | 98                 | 82                 |
| JAK3(JH1domain-catalytic)   | 83                 | 0                  | TYK2(JH1domain-catalytic)  | 77                 | 1.7                |
| JNK1                        | 97                 | 61                 | ULK2                       | 100                | 28                 |
| JNK2                        | 100                | 52                 | VEGFR2                     | 100                | 37                 |
| JNK3                        | 100                | 90                 | YANK3                      | 91                 | 89                 |
| KIT                         | 96                 | 47                 | ZAP70                      | 96                 | 95                 |
| KIT(D816V)                  | 99                 | 33                 |                            |                    |                    |

| %Ctrl Legend | 0≤x<0.1 | 0.1≤x<1 | 1≤x<10 | 10≤x<35 | 35≤x<50 | x≥50 |
|--------------|---------|---------|--------|---------|---------|------|
|--------------|---------|---------|--------|---------|---------|------|

**b**

| Compound Name | Selectivity Score Type | Number of Hits | Number of Non-Mutant Kinases | Screening Concentration ( $\mu$ M) | Selectivity Score |
|---------------|------------------------|----------------|------------------------------|------------------------------------|-------------------|
| 2012          | S(35)                  | 0              | 90                           | 1                                  | 0                 |
| 2012          | S(10)                  | 0              | 90                           | 1                                  | 0                 |
| 2012          | S(1)                   | 0              | 90                           | 1                                  | 0                 |
| Defactinib    | S(35)                  | 23             | 90                           | 1                                  | 0.256             |
| Defactinib    | S(10)                  | 11             | 90                           | 1                                  | 0.122             |
| Defactinib    | S(1)                   | 3              | 90                           | 1                                  | 0.033             |

**Supplementary Table 5. Eurofins KINOMEScan Profiling.** (a) The 97 kinases tested against 2012 and defactinib at 1  $\mu$ M and the resulting screen binding interactions reported as “% Ctrl”, where lower numbers indicate stronger hits in the matrix. %Ctrl Calculation = [(test compound signal – positive control signal) /

(negative control signal - positive control signal)] x 100. **(b)** Accompanying Selectivity Scores or S-scores which are quantitative measures of compound selectivity. They are calculated by dividing the number of kinases that compounds bind to by the total number of distinct kinases tested, excluding mutant variants.  $S(35) = (\text{number of non-mutant kinases with \%Ctrl} < 35) / (\text{number of non-mutant kinases tested})$ ,  $S(10) = (\text{number of non-mutant kinases with \%Ctrl} < 10) / (\text{number of non-mutant kinases tested})$ ,  $S(1) = (\text{number of non-mutant kinases with \%Ctrl} < 1) / (\text{number of non-mutant kinases tested})$ .
